1 **A novel core promoter element induces bidirectional transcription in**  
2 **CpG island**

3 Amin Mahpour<sup>1</sup>, Dominic Smiraglia<sup>1</sup>, Benjamin S. Scruggs<sup>2</sup>, Irwin H. Gelman<sup>1</sup> and Toru  
4 Ouchi<sup>1</sup>

5

6 <sup>1</sup> Department of Cancer genetics and Genomics, Roswell Park Cancer Institute, Buffalo,  
7 NY, 14263, USA

8 <sup>2</sup> Epigenetics and Stem Cell Biology Laboratory, National Institute of Environmental  
9 Health Sciences, Research Triangle Park, NC, 27709, USA

10

11 Correspondence:

12 Toru Ouchi

13 Email: [Toru.Ouchi@RoswellPark.org](mailto:Toru.Ouchi@RoswellPark.org),

14 Phone: (716) 845-7173

15

16 **Running title:**

17 A motif for bidirectional transcription

18

19 **Keywords:**

20 Transcription, Bidirectional Transcription, Gene Regulation, CpG Islands, TATA-less

21 Promoter, Core Promoter Element

## 22 **Abstract**

23 How TATA-less promoters such as those within CpG islands (CGI) control gene  
24 expression is still a subject of active research. Here, we have identified the “CGCG  
25 element”, a ten-base pair motif with a consensus sequence of TCTCGCGAGA present  
26 in a group of promoter-associated CGIs of ribosomal protein and housekeeping genes.  
27 This element is evolutionarily conserved in vertebrates, found in DNase-accessible  
28 regions and employs RNA polymerase 2 to activate gene expression. Through  
29 extensive analysis of several endogenous promoters, we demonstrate that this element  
30 activates bidirectional transcription through divergent start sites. Methylation of this  
31 element abrogates the associated promoter activity. When coincident with a TATA-box  
32 directional transcription remains CGCG-dependent. Because the CGCG element is  
33 sufficient to drive transcription, we propose that its unmethylated form functions as a  
34 core promoter of TATA-less CGI-associated promoters.

## 35 **Introduction**

36 Gene expression is one of the most critical, yet enigmatic, biological processes that  
37 defines cellular and organismal identity, and that mediates cellular response to internal  
38 and external stimuli <sup>1</sup>. Importantly, dysregulation of this process is known to contribute  
39 to various human diseases such as cancer <sup>2</sup>. With the discovery of RNA polymerases,  
40 the mechanisms of how transcription occurs have been extensively studied in many  
41 organisms <sup>3</sup>. In contrast to the relatively simple prokaryotic transcriptional system,  
42 metazoan transcription is considerably more elaborate and involves complicated  
43 promoter structures, multiple functional DNA elements and a repertoire of specific  
44 general transcription factors. These factors and DNA elements are required to facilitate  
45 accurate transcriptional initiation, elongation, and termination <sup>4-6</sup>.

46 The best-known DNA element that mediates the initiation of transcription of protein-  
47 coding genes is the TATA box with the consensus sequence TATAA <sup>7</sup>. This element is  
48 usually located 25 to 34 base pairs upstream of transcription start sites (TSS). However,  
49 most human promoters, including those regulating housekeeping genes lack this DNA  
50 element <sup>8</sup>, suggesting that TATA-less promoters are controlled by different yet poorly  
51 understood mechanisms. A few novel elements have been described that presumably  
52 function as core promoter elements in TATA-less promoters <sup>9-12</sup>. Yet, most of these  
53 promoter elements (e.g. GC-box or Inr motif) require additional transcriptional activator  
54 binding sites in order to drive directional transcription.

55 Vertebrate genomes contain short G+C rich sequences that are typically less than 1 kb  
56 long traditionally termed CpG islands (CGIs) <sup>13,14</sup>. These regions are considered to be

57 critical for transcriptional regulation of a large group of genes that include housekeeping  
58 genes <sup>15</sup>. Most CGI-associated promoters lack a TATA box yet contain “GC-box”  
59 binding sites for the general transcription factor SP1 although GC box is not sufficient to  
60 induce transcription on its own <sup>15-18</sup>. CGI-associated promoters typically induce  
61 bidirectional transcription that produces coding and non-coding transcripts <sup>19,20</sup>. Thus,  
62 depending on the stability of the non-coding RNA, CGI-associated promoters can  
63 generate more stable long non-coding RNAs (lncRNA) or short-lived transcripts <sup>21</sup>. To  
64 date, no specific independently-acting promoter element governing these CGI-  
65 associated bidirectional promoters has been described.

66 In this study, we analyzed DNase accessible CGIs in the K562 cell line and found an  
67 enriched motif with the consensus sequence of TCTCGCGAGA, which we termed the  
68 “CGCG element” due to the characteristic central bases. This element confers  
69 transcriptional activity independent of other transcriptional activator sequences.

70 Promoter sequences related to the CGCG element have been reported previously for  
71 several individual genes, but their functional significance was never explored <sup>22-25</sup>. A  
72 genome-wide computational study identified a similar motif among those motifs most  
73 enriched in human promoters, suggesting a possible functional role <sup>26</sup>. Our data indicate  
74 that the CGCG element is enriched in TATA-less CGI-associated promoters and  
75 evolutionarily conserved among vertebrates. Importantly, it is associated with  
76 bidirectional transcription only in the context of CGI-associated promoters as assessed  
77 by analysis of GRO-Cap and Start-seq datasets that identify sense versus anti-sense  
78 nascent transcripts and associated TSS. Using novel reporter constructs, we



79 demonstrate that the CGCG element suffices as a core promoter element to drive  
80 bidirectional transcription. Gene Ontology analysis indicates that this element is  
81 enriched in the promoters of housekeeping genes, most notably those controlling RNA  
82 metabolism and translation, and in promoters producing long non-coding RNAs.  
83 Together, our results indicate that the CGCG element functions as a previously  
84 unknown driver of CGI-associated TATA-less promoters.

## 85 **Results**

### 86 **Motif discovery in DNase-sensitive CpG islands**

87 Roughly 50 percent of human promoters are associated with a CGI <sup>27</sup>. To identify novel  
88 CGI-associated, independently-functioning promoter elements that potentially drive  
89 transcription independent of other promoter elements and are enriched in human CGIs  
90 (~30k), we extracted CGI sequences that overlapped with DNase-accessible regions  
91 (~192k DNase-seq peaks) in the K562 cell line. We then performed an unbiased motif  
92 discovery to identify the most enriched motifs in transcriptionally active CGI-associated  
93 promoters (figure 1a). As expected, the SP1 binding site (GC box) had the highest  
94 enrichment score consistent with its purported role in driving TATA-less promoters.  
95 Binding sites for NRF and ETS were also identified, consistent with roles for these  
96 transcription factors in the regulation of CGI-associated housekeeping genes <sup>28</sup>. We  
97 also identified two novel sequence motifs (#7 and #10) that were highly conserved  
98 within vertebrates. There were more than 400 incidences of motif #10 that coincided  
99 with DNase-seq footprints in multiple cell lines (K562 is shown), suggesting that this  
100 motif represents a shared regulatory element (figure 1b, Supplementary figure 1a).

101 Although most CGI-associated promoters contain one copy of the motifs shown in figure  
102 1a, motifs 7 and 10 occur in multiple copies in a given promoter (figure 1c). Genome  
103 Ontology and Metagene profile analyses showed that motif 7 and 10 are enriched  
104 significantly in annotated human CGI-containing promoters, with motif 10 being far more  
105 enriched in promoters of annotated coding and non-coding genes despite being less  
106 frequent (figure 1b; motif 7=1408 vs. motif 10=413 copies) (figure 1d).

### 107 **CGCG elements recruit transcriptional machinery and activate gene expression**

108 To determine whether motif 7 and 10 could confer transcriptional activity independently,  
109 we cloned the sequence of the most common variant of each motif (ACTACAATTCCC  
110 and TCTCGCGAGA, respectively) into the promoterless firefly luciferase reporter  
111 construct, Empty pGL2-basic. The resulting constructs were then separately  
112 cotransfected along with a control reporter for Renilla luciferase driven by the HSV-1  
113 thymidine kinase promoter (pRL-TK) into human embryonic kidney (HEK293T) cells.  
114 Motif 10, but not Motif 7, significantly activated firefly reporter gene expression (figure  
115 2a). This result encouraged us to focus on motif 10, which we named the “CGCG  
116 element” based on its central motif. A genome-wide analysis found that this element  
117 maps within 50bp of annotated TSSs in human and mouse genomes (Supplementary  
118 figure 1b) suggesting that this element could potentially function as a core promoter  
119 element<sup>29</sup>. To address the function of a specific naturally-occurring CGCG element, we  
120 analyzed the CGI-containing promoter of the human Density Regulated gene (*DENR*).  
121 The *DENR* promoter contains three tandem CGCG elements separated by 21 and 11  
122 nucleotides (figure 2b). To determine the role of each CGCG element in this promoter,

123 we inserted promoter fragments containing CGCG #1, CGCG #1,2 and CGCG #1,2,3  
124 into pGL2-basic. Although a single copy of the CGCG element significantly increased  
125 reporter activity, there was a 7- and 17-fold increase in reporter activity with the addition  
126 of the second and third CGCG elements, respectively. Introducing G to T mutations in  
127 all CGCG elements (CTCG #1,2,3) dramatically decreased promoter activity,  
128 suggesting that the CGCG element is necessary and sufficient to drive reporter  
129 expression and that there is a cooperativity between multiple CGCG elements (figure  
130 2c).

131 To determine if CGCG element-driven gene expression is dependent on RNA  
132 polymerase 2 (POL2), we transfected HEK293T cells with reporter constructs that  
133 contain either the consensus motif (TCTCGCGAGA) or a CTCG mutation  
134 (TCTCICGAGA) and performed a chromatin immunoprecipitation (ChIP) for POL2 <sup>30</sup>.  
135 As shown in figure 2d, POL2 bound the wild-type (WT) CGCG but not to the mutant  
136 CICG site. Analysis of the POL2 ChIP-seq ENCODE dataset in HEK293T cells  
137 identified POL2 binding peaks coincident with CGCG elements in the *DENR* promoter  
138 (figure 2b).  $\alpha$ -amanitin, a POL2 inhibitor <sup>31</sup>, decreased CGCG element-driven reporter  
139 expression (figure 2e), suggesting that POL2 is indispensable for CGCG dependent  
140 gene expression.

141 To assess the effect of removing CGCG elements on the endogenous *DENR* promoter  
142 activity, we employed a CRISPR/Cas9 double-nickase strategy <sup>32</sup> to delete a small  
143 CGCG-containing *DENR* region in the HEK293T cell line. One cell clone, containing a  
144 deletion of approximately 200 base pairs (bp) removed all three CGCG elements in one

145 allele, and a separate 100bp deletion removed one of the CGCG elements in the other  
146 allele without affecting the remaining CGI in the promoter (figure 2f). Removal of these  
147 CGCG-containing regions caused a significant decrease in the *DENR* transcript and  
148 protein levels compared to WT controls (figure 2g). Together with the reporter analyses,  
149 these findings suggest that CGCG elements actively recruit transcriptional machinery  
150 and promote gene expression in the CGI-associated promoter of *DENR* gene.

### 151 **CGCG element confers bidirectional transcription activity**

152 Due to the palindromic nature of the TCTCGCGAGA motif, we wondered whether the  
153 CGCG elements could also activate bidirectional transcription. To test this, we  
154 developed a novel bidirectional reporter construct (LuBiDi) to measure promoter activity  
155 using firefly and Renilla luciferase genes as reporters of directional transcription from a  
156 central control motif (figure 3a).

157 We inserted one or two copies of the TCTCGCGAGA motif into the LuBiDi plasmid and  
158 measured reporter activity. A single CGCG element was sufficient to induce both firefly  
159 and Renilla reporters whereas two CGCG elements induced an additional 4-fold  
160 increase (figure 3b). To study the motif sequence requirement for this activation, we  
161 introduced mutations in the motif that disrupted the wild-type sequence in various  
162 locations. First, to determine whether the palindromic structure was more important than  
163 sequence content in conferring the bidirectional transcriptional activity, we exchanged  
164 the flanking sequences to form AGACGCGTCT, which maintains both symmetry and  
165 CpG content. This mutation abrogated the dual activation of reporters (figure 3b),  
166 suggesting that the CGCG element has sequence polarity. A CGCG -> CTCG transition

167 mutation (TCTCICGAGA, reduced CG content) and an "A" insertion into CGCG  
168 (TCTCGACGAGA, unchanged CpG content) abrogated dual reporter activity (figure 3b).  
169 The inclusion of two copies of the A insertion mutant failed to induce transcription.  
170 Altogether, these results indicate that the WT element, CGCG core plus the flanking  
171 palindromic sequences found in motif 10, are required for promotion of bidirectional  
172 transcriptional activity.

173 To analyze the expression dynamics of CGCG elements in single cells, we developed  
174 another promoter-less bidirectional reporter (pmCGFP) that codes for enhanced Green  
175 Fluorescent Protein (eGFP) and mCherry reporters in opposite directions (Supplement  
176 figure 2a). One or three copies of TCTCGCGAGA motifs were inserted into this reporter  
177 construct, which were then cotransfected into HEK293T cells along with a CMV  
178 promoter construct driving the Blue Fluorescent Protein (BFP) as a transfection control.  
179 Cells simultaneously expressed both GFP and mCherry reporter genes starting 12  
180 hours after transfection only for constructs containing the TCTCGCGAGA element  
181 (supplement figure 2b). Immunoblot analysis indicated that GFP and mCherry protein  
182 levels were proportional to the number of inserted TCTCGCGAGA motifs (Supplement  
183 figure 2c). We also tracked individual cells using live imaging microscopy and observed  
184 that the two reporter genes are expressed simultaneously after transfection  
185 (Supplement figure 2d; Supplementary Video). We also performed a similar imaging  
186 experiment using an mCherry reporter fused to the H2b in HEK293T and NMuMG  
187 mouse mammary cell lines, again showing simultaneous expression of both reporters

188 (Supplementary Figure 2e, f). Collectively, these results suggest that this element is a  
189 potent bidirectional transcription activator in multiple species.

190 An analysis of human CGI-associated promoters indicated that CGCG elements could  
191 also contain less frequent, single nucleotide variations in TCT or AGA flanking  
192 sequences (figure 3c). To determine the impact of these minor variations on  
193 bidirectional transcription activity, we compared LuBiDi constructs with one  
194 TCTCGCGAGA motif to those containing naturally variant sequences, using the AGA <-  
195 > TCT flank-exchanged mutant as a negative control (figure 3d, the variation in a  
196 specific nucleotide is underlined). CCT, AGG or ATG flanking sequences (underline  
197 represents changes) decreased relative dual reporter activity whereas variants that  
198 contain AIA or TAT showed similar activity to that of the TCTCGCGAGA motif (figure  
199 3d). The data suggest that some, but not all, variability in the flanking sequences confer  
200 core promoter activity, albeit at lower efficiencies compared to the TCTCGCGAGA  
201 motif. The data also showed that imperfect palindrome elements can still drive  
202 bidirectional transcription.

203 To study the role of copy number variation on bidirectional transcription activity in more  
204 detail, we generated LuBiDi reporters that contain one, two or four copies of  
205 TATCGCGAGA, a common variant of the CGCG element with an imperfect palindrome.  
206 Reporter activity increased proportionally with the number of motifs as measured by  
207 luciferase activity or luciferase transcript levels (figure 3e, f).

208 **Endogenous CGCG elements confer transcriptional activity in CGI-associated**  
209 **promoters and methylation abrogates its promoter activity**

210 To determine if CGCG elements are associated with bidirectional transcription from  
211 endogenous promoters, we analyzed a previously published GRO-cap (global run-on  
212 sequencing followed by enrichment for 5'-cap structure) analysis performed on K562  
213 cells<sup>33</sup>. GRO-cap allows for the detection of nascent, often unstable strand-specific  
214 RNA transcripts that are usually undetectable by common RNA-seq methods, likely  
215 because of the greatly increased sequencing depth near to TSS associated with  
216 directional transcription of coding RNAs. We found that the bidirectional transcription is  
217 associated almost exclusively with CGCG elements that occur in CGI-enriched  
218 promoters (figure 4a). Gene Ontology (GO) analysis showed that genes containing  
219 CGCG promoter element produce protein-coding transcripts whose products form  
220 discernable protein-protein interacting networks (Supplementary figure 3). Specifically,  
221 these genes encode core components of RNA metabolism and the translational  
222 apparatus (Table 1).

223 CpG dinucleotides in CGI-associated promoters are invariably unmethylated<sup>13</sup>, we  
224 asked if the methylation state of the CGCG elements might explain the observation that  
225 only the elements within CGIs are transcriptionally active. Analysis of ENCODE Whole  
226 Genome Bisulfate Sequencing (WGBS) from K562 cells indicated that in contrast to  
227 CpG-poor regions of the genome, CGCG elements in CGIs are largely unmethylated  
228 (figure 4a). This observation prompted us to determine experimentally whether CpG  
229 methylation could alter the promoter activity of the CGCG element. We cloned a single

230 copy of TCTCGCGAGA into a secretory luciferase reporter construct that is devoid of  
231 CpG sequences (CpG-free Lucia). In this construct, the only CpG sequences are the  
232 ones contributed by the CGCG element (figure 4b). The CpG sequences were then fully  
233 methylated using M.SssI CpG methyltransferase, confirmed by saturated methyl-  
234 sensitive enzymatic digestion (figure 4c). In comparison to the high reporter activity  
235 induced by the unmethylated TCTCGCGAGA-containing construct, methylation  
236 abrogated the promoter activity (figure 4d), strongly suggesting that CGCG methylation  
237 antagonizes its promoter function.

238 A transcription factor zBTB33, also known as Kaiso, was shown previously to be  
239 enriched on methylated "CGCG" nucleotides<sup>34</sup>. Kaiso has been shown to interact with  
240 the repressive complex SMRT, leading to suppression of gene expression<sup>35</sup>. As  
241 illustrated in figure 4e, this transcription factor interacts only with the methylated CGCG  
242 element confirming previous observations<sup>36</sup>. The transient overexpression of Kaiso in  
243 HEK293T cells did not significantly alter the endogenous DENR protein level (figure 4f).  
244 These results indicate that Kaiso does not bind to the CGCG element when it is not  
245 methylated. Since Kaiso does not suppress the DENR promoter activity when  
246 expressed in 293T cells, it is suggested that the CGCG element in the DENR promoter  
247 is not methylated in vivo. Thus, Kaiso along with other zBTB family members likely  
248 suppress the CGCG element-driven gene expression only when this element is  
249 methylated.



250 **The CGCG element activates gene expression in different promoter**

251 **configurations**

252 Given that the CGCG element drives bidirectional transcription, we were interested to  
253 determine the frequency of this element in annotated uni- vs. bidirectional promoters.  
254 The vast majority of CGCG elements (93%) occur in annotated unidirectional promoters  
255 that drive coding or lncRNAs, while 7% occur in an annotated bidirectional promoter  
256 (Table 2). However, recent studies suggest that the majority of what were classically  
257 defined as unidirectional promoters produce unstable “promoter upstream transcripts”  
258 (PROMPTS)<sup>37</sup>. Based on this, we investigated the role of CGCG elements in three  
259 different endogenous promoters that differ in their annotated directionality and whether  
260 they combine CGCG element with TATA-boxes. In order to determine the role of  
261 endogenous CGCG elements, we simultaneously disrupt CGCG element but  
262 maintained CG content by exchanging the flanking sequences (i.e. TCTCGCGAGA to  
263 AGACGCGTCT). We first focused on the *POLR1C/YIPF3* bidirectional promoter region,  
264 which has two TSS separated by 30 nucleotides that flank a single CGCG element. We  
265 inserted a promoter fragment (~30bp) containing the wild-type CGCG element into the  
266 LuBiDi construct, and as a comparison, constructs were generated in which the flanking  
267 sequences (AGA and TCT) were exchanged. The WT fragment from *POLR1C/YIPF3*  
268 promoter induced bidirectional expression irrespective of its orientation (figure 5a). In  
269 contrast, the flank-exchanged mutants, regardless of insert orientation, did not show  
270 any discernable reporter activity.

271 Next, we analyzed the *ZZZ3* promoter which is similar to the *DENR* promoter in that it  
272 contains three CGCG elements (figure 5b). Although the promoter is annotated as  
273 directional, PROMPTs on the opposite strand in both the K562 and GM12878 GRO-Cap  
274 datasets were found (figure 5b, UCSC genome browser plot). To determine whether  
275 these elements are responsible for the *ZZZ3* divergent transcript, we inserted CGCG  
276 elements or flank-exchanged elements, from the *ZZZ3* promoter into a LuBiDi construct.  
277 As shown in figure 5b, WT sequences but not flank-exchanged could induce  
278 bidirectional reporter expression. An analysis of the *DENR* promoter also showed that  
279 their three CGCG elements drive bidirectional transcription in LuBiDi and disruption of  
280 CGCG core sequences with A insertions abrogated the bidirectional promoter activity  
281 (Supplementary figure 4).

282 We also studied the *PRDX1* promoter, a rare example in which both a single CGCG  
283 element plus a TATA-box map within the CpG enriched promoter<sup>38</sup>. An analysis of  
284 GRO-Cap datasets indicated a predominant TSS approximately 25 nucleotides  
285 downstream of the TATA-box (figure 5c), yet divergent transcripts were found starting  
286 roughly 50-70 bp upstream of the coding region in both K562 and GM12878 cells. To  
287 investigate the role of the TATA-box in this configuration, we inserted a fragment  
288 containing the TATA-box and CGCG element from this promoter into LuBiDi. We also  
289 produced mutants including one that disrupted the first TA in the TATA-box with CC  
290 sequences and another in which the TATA-box orientation was reversed relative to the  
291 CGCG element. The WT *PRDX1* promoter mainly drove unidirectional downstream  
292 transcription (figure 5c) although some opposite direction reporter activity was noted.

293 Mutation of the TATA-box severely attenuated downstream directional promoter activity  
294 (figure 5c). Interestingly, the reporter containing a flank-exchanged CGCG element did  
295 not show any reporter activity even in the presence of a WT TATA-box, suggesting that  
296 the CGCG element not only promotes divergent transcription but also acts as a required  
297 activator for the TATA-box in this promoter.

298 To further study the role of CGCG elements in the context of bidirectional promoters, we  
299 analyzed a set of mouse bidirectional promoters previously defined using Start-seq<sup>39</sup>.  
300 We assessed the presence of CGCG elements throughout the intervening region in  
301 such bidirectional promoters. The coupled sense/anti-sense TSS form boundaries that  
302 flank a nucleosome-depleted region (NDR), characterized by an open chromatin  
303 structure that permits high accessibility for transcriptional machinery (figure 5d). This  
304 analysis indicated that although CGCG elements do not show a fixed distance to sense  
305 or anti-sense Start-seq TSSs, they are found mostly in NDRs of mouse bidirectional  
306 promoters.

### 307 **CGCG elements promote transcription through divergent TSS**

308 Previously identified core promoter elements such as the TATA box and the TCT motif  
309 promote transcription through a focused putative TSS that occurs either at a fixed  
310 distance downstream (in the case of TATA box) or on a specific nucleotide within the  
311 element in the case of TCT motif<sup>40</sup>. To map the bidirectional TSSs associated with the  
312 CGCG element, we employed 5' RACE (5' Rapid Amplification of cDNA Ends) using  
313 RNA extracted from HEK293T cells transfected with LuBiDi reporter constructs along  
314 with pEGFP as a transfection control (figure 6a). This robust method has been

315 successfully used to determine the TSS of many genes in human and other organisms  
316 previously<sup>41,42</sup>. As shown in Figure 6b, 5' RACE produced major single products for  
317 firefly and Renilla transcripts from a LuBiDi construct containing one copy of the  
318 TCTCGCGAGA motif. Sequencing of the resulting RACE products showed a preference  
319 for A or G as the +1 nucleotide, and C or T as the -1 nucleotide, conforming to the  
320 previous observation that ideal TSS tend to use pyrimidines and purines at the -1 and  
321 +1 positions, respectively<sup>38</sup>. Although multiple TSSs were found in the sense or anti-  
322 sense directions, there was a predominant firefly TSS (7 of 25 clones) 28 nucleotides  
323 and a predominant Renilla TSS (9 of 21 clones) 51 nucleotide from the TCTCGCGAGA  
324 element (figure 6c). However, a majority of preferred Renilla TSS were downstream of  
325 the Renilla initiation codon (ATG), and thus, unlikely to produce active Renilla luciferase  
326 product. This likely explains why the relative Renilla luciferase activity is always lower  
327 than that of the firefly as was previously observed in figure 3b.

328 Next, we determined how the presence of a TATA-box affects CGCG element-driven  
329 transcription from the LuBiDi reporter containing both elements from the *PRDX1*  
330 promoter. In this construct, the TATA-box is arranged between the Renilla reporter and  
331 the CGCG element. Sequencing of the Renilla RACE products showed a predominant  
332 TSS (7 of 13 clones) 26 nucleotides downstream of the TATA box on the Renilla-coding  
333 strand (figure 6d). In contrast, on the firefly reporter coding strand, there was a  
334 concentration of multiple TSSs 40-43 nucleotides downstream of CGCG element. This  
335 TSS pattern differs from those induced from the construct containing one copy of the  
336 CGCG element (figure 6c). Together with reporter data presented in figure 5c, these

337 results suggest that the CGCG element and TATA box cooperate to induce transcription  
338 in the *PRDX1* promoter.

## 339 **Discussion**

340 In this study, we identify a novel promoter element that drives bidirectional transcription  
341 mainly in the context of TATA-less promoters. Whereas other promoter elements (e.g.  
342 TATA and GC boxes) require an activator binding site to initiate directional transcription  
343 <sup>6</sup>, a single instance of the CGCG element is both necessary and sufficient to promote  
344 bidirectional transcription. However, in comparison to other known core promoter  
345 elements, which typically occur once in most promoters, CGCG elements occur in  
346 multiple copies in small percentages of CGI-containing promoters, a phenomenon that  
347 could potentially dictate RNA polymerase recruitment and consequent transcriptional  
348 rates.

349 An interesting yet poorly studied feature of vertebrate genomes is the presence of CpG  
350 rich regions known as CGIs <sup>14</sup>. Although CGIs mark transcriptionally active regions of  
351 the genome, the mechanism of RNA polymerase recruitment in these regions has been  
352 elusive <sup>13</sup>. Through enrichment analysis, we found that CGCG elements are enriched in  
353 CGI-containing promoters and that they can recruit transcriptional machinery to promote  
354 bidirectional transcription, a feature that most transcriptionally active CpG islands was  
355 shown to possess <sup>19</sup>. Additionally, we provide evidence that in some rare cases, the  
356 CGCG element could interact functionally with an adjacent TATA-box within a CGI to  
357 activate gene expression. Similar synergetic activities have been described previously

358 <sup>43,44</sup> suggesting that the CGCG element also shares this attribute with other known core  
359 promoter elements.

360 How housekeeping genes whose products are core components of cellular processes  
361 are transcriptionally regulated is poorly understood. In this study, we found that genes  
362 whose products play a central role in translation and transcription are enriched for  
363 CGCG elements in their CGI-associated promoters. This analysis led us to identify a  
364 group of ribosomal genes whose CpG rich promoters contain one or multiple copies of  
365 CGCG elements (Supplementary Figure 5). These promoters do not contain the  
366 previously described TCT motif that is thought to regulate the transcription of the other  
367 group of ribosomal genes in humans <sup>40</sup>. These results suggest that TCT and CGCG  
368 elements regulate the expression of different sets of ribosomal genes in human. In  
369 addition to genes encoding ribosomal proteins, promoters of key translation initiation  
370 factor genes encoding EIF5, EIF3H, and DENR, as well as the essential translation  
371 termination factor ETF1, contain copies of the CGCG elements. This is consistent with  
372 the current perspective that different classes of promoter elements regulate functionally  
373 distinct protein coding genes <sup>1</sup>.

374 Additionally, we directly demonstrated that methylation of CpGs in the CGCG element  
375 could suppress its promoter activity. Indeed, roughly 80 percent of CpG sites in the  
376 genome, particularly CpGs that occur outside of CGIs, are methylated <sup>45</sup>. We speculate  
377 a switch-like mechanism that could activate or repress gene expression based on the  
378 methylation status of CGCG elements. Accordingly, we propose a model where CGCG  
379 elements, when occurring in CGIs, are protected from methylation thereby maintaining

380 promoter activity in housekeeping genes. In contrast, CGCG elements in other regions  
381 of the genome would be more subject to methylation, resulting in transcriptional  
382 silencing. In theory, DNA methylation of CGCG elements could protect the genome from  
383 spurious transcription, as reviewed elsewhere <sup>46</sup>. A similar switch-like mechanism for a  
384 group of transcription factors that contain CpG motif has been described in the past in  
385 which CpG methylation would affect the affinity of transcription factors such as Kaiso <sup>47</sup>.  
386 Although the nature of the factor, or factors, that bind to non-methyl CGCG element has  
387 yet to be clarified, our results suggest that ChIP-seq studies should be interpreted with  
388 greater consideration to account for the differential binding of proteins to methyl or non-  
389 methyl CpG-containing motif sequences.

390 In a recent study, Dual Specificity Kinase 1 (DYRK1A) was identified as a novel POL2  
391 C-terminal domain (CTD) kinase and activator of RNA polymerase 2 <sup>48</sup>. Subsequent  
392 ChIP-seq analysis of DYRK1A showed that this protein is specifically enriched in CGCG  
393 containing promoters. It has been suggested that RNA polymerases are recruited  
394 through various transcriptional preinitiation complexes (PIC) that specifically regulate  
395 different promoter classes <sup>1,49</sup>. Therefore, we speculate that CGCG elements directly or  
396 indirectly recruit DYRK1A as the component of a novel PIC that remains to be  
397 completely elucidated.

398 In conclusion, this study provides strong evidence that the CGCG element is  
399 evolutionarily conserved in vertebrates, functioning as an active component of CGI-  
400 associated promoters. The unmethylated form of the element may be sufficient to drive  
401 bidirectional transcription of TATA-less promoters. With the identification of the CGCG

402 element interacting factor or factors in the future, we may soon gain a better picture of  
403 how basal transcription of TATA-less housekeeping genes is regulated.



## 404 **Materials and Methods**

### 405 **Cell culture and treatments**

406 Human embryonic kidney 293T and NMuMG cell line were cultured in Dulbecco's  
407 Modified Eagle Medium (DMEM) media supplemented with 10% fetal bovine serum,  
408 penicillin and streptomycin antibiotics. Cell lines were grown in an incubator at 37°C and  
409 5% CO<sub>2</sub>.

410 For the  $\alpha$ -amanitin treatment experiment, HEK293T Cells were transfected with SV40  
411 promoter-driven firefly reporter (pGL2-pro), or a construct containing a copy of  
412 TCTCGCGAGA. 24 h post-transfection, cells were treated with 5  $\mu$ g/ml  $\alpha$ -amanitin  
413 (Santa Cruz) as described<sup>50</sup> or with PBS (control), and firefly and Renilla luciferase  
414 bioluminescence activities were measured 24h after treatment.

### 415 **Reporter constructions and assays**

416 One to three copies of the CGCG elements from *DENR* promoter were synthesized as  
417 double stranded oligonucleotides (IDT DNA) and cloned into the BglII and MluI  
418 restriction sites of a luciferase reporter construct that lacks promoter sequences (pGL2-  
419 basic, Promega). 1  $\mu$ g of cloned reporter DNA along with 100 ng of a Renilla reporter  
420 construct (pRL-TK) as transfection control were transfected into HEK293T using Roche  
421 X-tremeGENE 9 (Roche) transfection reagent according to manufacturer's protocol. The  
422 luciferase activities were measured 24 h after transfection according to the Dual  
423 Luciferase assay protocol (Promega).

424 Luciferase bidirectional (Empty-LuBiDi) reporter was constructed by PCR amplification  
425 and subsequent cloning of the firefly luciferase gene from pGL2-Basic into the BglIII site  
426 of promoterless Renilla cassette from the pRL-Null plasmid and followed by site-  
427 directed mutagenesis to remove secondary BglIII recognition site downstream of firefly  
428 poly-A site. The primer sequences used are available in supplementary information 1.  
429 Bioluminescence assays were performed as described above except that transfection  
430 was normalized by co-transfecting with a vector that expresses secretory alkaline  
431 phosphatase (pSELECT-zeo-SEAP, Invivogene) into the medium.  
432 For the construction of the bidirectional fluorescence reporter, pmCGFP, we PCR  
433 amplified and cloned the h2b-mCherry fused gene (plasmid Addgene id #20972) head-  
434 to-head into a promoterless eGFP containing construct. The resulting construct (eGFP +  
435 h2b-mCherry) was then digested with AgeI to release h2b-coding fragment and auto-  
436 ligated to generate the pmCGFP (eGFP + mCherry). Double strand oligonucleotides  
437 encoding one or three copies of TCTCGCGAGA into the AgeI restriction site of this  
438 reporter.  
439 For CpG free reporter and methylation experiments, an oligonucleotide encoding single  
440 copy of TCTCGCGAGA was inserted into HindIII restriction site of pCpGfree-basic-  
441 Lucia (Invivogen). 10 µg of purified plasmid was incubated with 10 enzymatic unit (U)  
442 M.SssI methyltransferase (NEB) supplemented with fresh 100 µM S-adenosyl  
443 methionine (SAM) as the methyl donor in 37°C for 8h. DNA was extracted using phenol-  
444 chloroform followed by ethanol precipitation. The DNA was incubated for another 8h  
445 after addition of 10 U M.SssI which was followed by DNA extraction as described

446 before. As a control, a mock reaction was also carried out lacking M.SssI enzyme. To  
447 test the methylation efficiency, we digested 300ng of reporter constructs using 10 U of  
448 NheI and BstUI for 30 min. Because CGCG methylation blocks BstUI cleavage, EMPTY  
449 and methylated construct digested only by NheI enzyme producing two  
450 indistinguishable bands at 2.4 kb. However, unmethylated TCTCGCGAGA which is cut  
451 by BstUI enzyme, as well as NheI, produced three smaller bands  
452 The sequences of inserts for each promoter fragment and related mutations are  
453 provided in the Supplementary information.

#### 454 **qRT-PCR**

455 HEK 293T cells were transfected with 1 µg of LuBiDi reporters containing 0, 1, 2, 4  
456 copies of TCTCGCGATA. Cells were lysed after 24 h using TRIzol (Life Technologies),  
457 and RNA was extracted using a chloroform-isopropanol protocol. RNase-free DNase I  
458 (Thermo Fischer Scientific) was then used to digest contaminating DNA followed by  
459 extraction by acidic-phenol chloroform protocol, precipitated using ethanol and  
460 dissolved in RNase-free water. 1 µg of the resulting purified RNA was used to prepare  
461 cDNA using M-MLV reverse transcriptase according to manufacturer's recommended  
462 protocol (Life Technologies). Transcript levels were measured using iTaq Universal  
463 SYBR Green Supermix (Bio-Rad) on an ABI-7900 RT-PCR instrument. Transcript levels  
464 were normalized using primers for *HPRT1*. Primers designed to amplify the bacterially  
465 expressed AMP resistant gene in the LuBiDi construct were used as negative control to  
466 rule out plasmid contamination. Melting curves analyses for all PCR experiments were

467 performed to validate faithful amplification of PCR products. Information on primer  
468 sequences is described in Supplementary Information 1.

### 469 **Chromatin Immunoprecipitation (ChIP)**

470 ChIP was performed according to a protocol described in Lee, et al. <sup>51</sup>. In brief, 10  
471 million HEK 293T cells were cultured in 15 cm dishes and transfected with 10 µg  
472 reporter DNA using X-tremeGENE 9 transfection reagent. 48 h post-transfection cells  
473 were treated with the cross-linking reagent formaldehyde (1% in PBS, Sigma) for 5min.  
474 Glycine solution (0.125 M) for 10min was used to stop the cross-linking reaction.  
475 Followed by 2 washes with ice-cold PBS. 10 million cells were lysed with lysing buffer  
476 (50 mM HEPES-KOH, pH 7.5, 140 mM NaCl, 1 mM EDTA, 10% glycerol, 0.5% NP-40,  
477 0.25% Triton X-100, 1X protease inhibitors), and their nuclei were isolated by  
478 centrifugation (5 min, 1000 RPM) and then sonicated in sonication buffer (10 mM Tris-  
479 HCl, pH 8.0, 100 mM NaCl, 1 mM EDTA, 0.5 mM EGTA, 0.1% Na-Deoxycholate, 0.5%  
480 N-lauroylsarcosine, 1X protease inhibitors) on Biorupter<sup>®</sup> (Diagenode) by two rounds of  
481 10min sonication to obtain 300-600bp range chromatin fragments. The resulting  
482 sheared chromatin was immunoprecipitated (IP) using 20 µg of antibody against POL2  
483 (Santa Cruz, N-10), a non-specific Isotype Mouse IgG as a mock control (Santa Cruz).  
484 The IP complexes were then extracted using Protein A/G Dynabeads and washed five  
485 times using RIPA washing buffer (50 mM HEPES-KOH, pKa 7.55, 500 mM LiCl, 1 mM  
486 EDTA, 1.0% NP-40, 0.7% Na-deoxycholate). The DNA was extracted from the beads  
487 using an elution buffer (50 mM Tris-HCl, pH 8.0, 10 mM EDTA, 1.0% SDS) and  
488 quantified by qPCR using primers designed to amplify the promoter region of the

489 reporter construct. Information on primer sequences is described in Supplementary  
490 Information 1.

#### 491 **Fluorescent microscopy and live imaging**

492 1  $\mu$ g of pmCGFP reporter constructs containing 0, 1, 2 copies of TCTCGCGAGA along  
493 with a CMV promoter-driven Blue Fluorescent Protein expression plasmid (CMV-BFP)  
494 were transfected into HEK293T cells. Images were taken 24 h post-transfection using a  
495 Nikon Eclipse TE2000-E fluorescence microscope. For live imaging, images were taken  
496 every 15 min with an exposure time of 1 sec immediately after reporter transfection for  
497 24 h in an incubating chamber supplied with humidity and 5 percent conditions. 16-bit  
498 Tiff images from individual channels were used to generate MOV files using the  
499 Videomach software (<http://gromada.com/videomach/>). The final production video was  
500 produced using Adobe Premiere CC 2017.

#### 501 **Double nickase Cas9 mediated genome editing of DENR promoter**

502 Short guide RNAs (sgRNAs) to target *DENR* promoter were designed using the MIT  
503 CRISPR sgRNA design tool (<http://crispr.mit.edu/>). The DNA sequences of guides  
504 (Supplementary Information 1) were then cloned into pSpCas9 (BB)-2A-GFP (PX458)  
505 and pSpCas9 (BB)-2A-Puro (PX459) V2.0 (Addgene plasmid numbers 48138 and  
506 62988). Constructs were then co-transfected into HEK 293T cells and 24 hrs later  
507 selected for Puromycine resistance (3  $\mu$ g/mL) for another 72 hours. GFP-expressing  
508 single cells were sorted using Aria II FACS instrument and incubated in 96 well dishes  
509 for two weeks to form visible cellular clones. DNA was extracted from the clones using  
510 QuickExtract<sup>TM</sup> solution (Epibio), and successful deletions were confirmed by Sanger

511 sequencing of PCR products. Ribbon sequences were produced using the pyRibbon  
512 software which we deposited in <https://github.com/AminMahpour/pyRibbon>.

### 513 **Immunoblotting**

514 Cells were lysed in NET-N buffer (100 mM NaCl, 20 mM Tris-HCl pH 8.0, 0.5 mM  
515 EDTA, 0.5% NP-40) supplemented with protease inhibitors cocktail at 4°C. In all  
516 experiments, 20 µg of total proteins/lane analyzed by SDS-PAGE followed by blotting as  
517 described in Previs, et al. <sup>52</sup>. Antibodies included those specific for DENR (Santa Cruz  
518 22), GFP (Santa Cruz B-2), mCherry (Abcam 1C51) or alpha-tubulin (Santa Cruz A-6)  
519 as a loading control.

### 520 **Oligonucleotide pull-down assay**

521 To determine whether CGCG elements can bind to Kaiso, we separately synthesized  
522 biotin-tagged DNA duplex that contained unmodified TCTCGCGAGA, TCTCICGAGA  
523 or completely methylated (TCT<sup>me</sup>CG<sup>me</sup>CGAGA). 10 µM from each duplex were bound  
524 and washed to 100 µl Streptavidin Dynabeads as recommended by the manufacturer  
525 (Invitrogen). HEK293T cells were lysed using NET-N buffer containing protease  
526 inhibitors cocktail (Sigma) and incubated on ice for 30 min. Lysates were centrifuged at  
527 12000 RPM for 10 min to pellet cellular debris, and supernatant representing 500 µg  
528 protein was mixed with duplex-charged beads and incubated at 4°C overnight. The  
529 beads were washed five times with NET-N buffer, incubated with 50 µl Laemmli loading  
530 buffer (1X: 0.02% w/v bromophenol blue, 4% SDS, 20% glycerol, 120 mM Tris-Cl, pH  
531 6.8) and boiled for 5 min to elute bound proteins. The proteins were analyzed by  
532 immunoblotting for Kaiso (Santa Cruz D-10) and control antibody.

### 533 **Rapid Amplification of cDNA ends (5' RACE)**

534 To determine divergent TSSs, we transfected near confluent HEK293T cells in 10 cm  
535 dishes with 5 µg LuBiDi construct along with 0.5 µg pEGFP-C1 to monitor transfection  
536 in the following day. RNA was extracted as described before 72 h after transfection. The  
537 quality and purity of RNA were evaluated using Agilent 2100 Bioanalyzer and samples  
538 with RNA integrity number (RIN) values  $\geq 8.0$  were selected for further analysis. The  
539 SMARTer 5' RACE (Clontech) protocol was used to determine divergent TSSs from 10  
540 µg of total RNA. Briefly, the RNA was first reverse transcribed at 42°C for 90 min using  
541 poly-dT primers and extended beyond TSS using RT-mediated template switching that  
542 employs the SMARTer IIA Oligonucleotide as the template only when the 5' cap is  
543 encountered. The resulting cDNA products were amplified using specific internal  
544 primers for either firefly or Renilla plus the Clontech Universal Primer Mix (UPM). A GFP  
545 primer set was used as an internal control. Primer sequences used in RACE  
546 experiments are provided in the Supplementary Information 1. The PCR products  
547 containing TSS were directionally cloned into the linearized pRACE vector using the In-  
548 fusion HD system, and individual bacterial clones were obtained following  
549 transformation of the ligated products into Stellar competent cells. Sanger sequencing  
550 of the resulting plasmid clones (using M13 primer) was used to identify TSSs.

## 551 **Genomic analysis**

### 552 *Motif Discovery*

553 The CpG island annotation track in the human genome (hg38) was downloaded from  
554 the UCSC genome browser (<https://genome.ucsc.edu>), and sequences that overlap with  
555 K562 DNase-seq peaks track were extracted using Bedtools<sup>53</sup>. The resulting  
556 sequences were used for motif discovery using the findMotifgenomewide script in the  
557 Homer bioinformatics software suite using default command line arguments for the  
558 human genome<sup>54</sup>.

### 559 *Genomic annotation and Metagene analysis*

560 The scanMotifgenomewide script from the Homer program version 4.8 was used to  
561 locate all instances of motif 7 and 10 in human (hg38) and mouse (mm9) genomes. The  
562 annotatePeaks script (Homer) was used to identify motif co-occurrence, genomic  
563 annotations, metagene, and enrichment analysis.

### 564 *ENCODE Conservation, DNase-seq, GRO-Cap, WGBS*

565 Processed data points for hg38 were extracted and processed using Wigman software  
566 for 50 bp upstream and downstream windows for each motif occurrence. For ENCODE  
567 WGBS (accession number ENCFF867JRG). The PhyloP and PhastCons conservation  
568 scores for hg38 assembly were downloaded from the UCSC genome browser  
569 (<http://hgdownload.cse.ucsc.edu/downloads.html>). ENCODE accession number  
570 ENCFF867JRG was used for K562 DNase-seq data. The GRO-Cap dataset for K562  
571 and GM12878 cell lines with GEO accession number of GSM1480321 was used to  
572 analyze nascent transcripts in promoters. POL2 ChIP-seq from K562 cell line with the



573 accession number of ENCF000YWS was used to determine POL2 occupancy state on  
574 CGCG elements. Heatmap plots were generated using the in-house written Wigman  
575 software (<https://github.com/AminMahpour/Wigman>).

#### 576 *Gene Ontology and gene network analysis*

577 Bedtools Closest feature was used to compile a list of genes that their annotated TSS  
578 are less than 500bp from CGCG elements on both plus and minus strand from the latest  
579 hg38 GTF annotation file (<http://www.ensembl.org/info/data/ftp/index.html>). A custom  
580 script was written and used to determine the number of CGCG elements in annotated  
581 coding, non-coding, uni- and bi-directional CGI promoters.

582 Gene Ontology (GO) analysis performed using GOrilla gene enrichment analysis  
583 platform. A list of CpG islands-associated genes was used as the background genes for  
584 enrichment analysis<sup>55</sup>. GO enrichment score is defined as  $(b/n)/(B/N)$ , where N is the  
585 total number of background CpG island-associated genes that have a GO term, B is the  
586 number of genes associated with a specified GO term, and n is the number of genes  
587 whose promoter contain CGCG element and b is the number of genes in the  
588 intersection. Gene set interaction networks were generated and analyzed using  
589 REACTOME package v53 (<http://www.reactome.org/>). Network were visualized  
590 graphically using Cytoscape software version 3.5 (<http://www.cytoscape.org/>)

#### 591 *Start-seq analysis*

592 Start-seq from mouse bone-marrow derived macrophages was published previously  
593 and is available for download from GEO website (GSE62151,

594 <https://www.ncbi.nlm.nih.gov/geo/>). Data were analyzed as described previously. Briefly,  
595 reads were aligned uniquely to the mm9 genome allowing a maximum of two  
596 mismatches with Bowtie version 0.12.8 (-m1 -v2). Sense and divergent TSS were  
597 assigned as defined previously. Start-seq heat maps depict Start-RNA reads in 10 bp  
598 bins at the indicated distances with respect to the TSS. Heatmap plots were generated  
599 using Partek Genomics Suite version 6.12.1012.

600 Individual CGCG element occurrences were identified with FIMO<sup>56</sup>. A  $\pm 1$  kbp window  
601 around TSSs was scanned with a position weight matrix for the CGCG motif with a p-  
602 value threshold of 0.001. Motif occurrences were mapped with respect to TSS locations  
603 using custom scripts and counted in 10-mer bins. Composite Metagene distributions  
604 were generated by summing motifs at each indicated position with respect to the TSS  
605 and dividing by the number of TSSs included within each group.

606 **Statistical Analysis:**

607 All plots were generated and analyzed using GraphPad Prism version 7. Unless noted  
608 otherwise, all statistical analyses were performed using Student t-test. The following p-  
609 values are presented as \*:  $p < 0.05$ , \*\*:  $p < 0.01$ , \*\*\*:  $p < 0.001$ , \*\*\*\*:  $p < 0.0001$ . Error bars  
610 represent standard deviation (S.D) from the mean.

## 611 **Author Contributions**

612 A.M conceived the project, performed experiments, analyzed experimental and  
613 informatics data, interpreted the results and wrote the manuscript. B.S analyzed mouse  
614 Start-seq data and assisted in manuscript preparation. D.S and I.G contributed to the

615 project design and edited the manuscript. T.O secured funding and supervised the  
616 project.

## 617 **Acknowledgment**

618 Authors would like to thank William Burhans for his valuable input and criticism of the  
619 manuscript, and for members of the Ouchi and Gelman laboratories for discussion. This  
620 work was supported in part by NIH CA90631 (T.O.) and Susan Komen Breast Cancer  
621 Foundation (T.O.). The first author would like to dedicate this paper to his parents.

## 622 **Figures**

### 623 **Figure 1 Identification of enriched motifs in human CGIs**

624 a) The intersecting region between K562 DNase-accessible peaks and CpG islands  
625 was used to identify enriched regulatory motifs. Among other known transcription factor  
626 binding sites, two previously uncharacterized motifs, #7 and #10, were identified. b)  
627 Base-wise (PhyloP) and predicted conserved elements (phastCons) score profiles of  
628 motif number 7 and 10 in human CGIs and the flanking 50 nucleotides highlight the  
629 conservation of these two motifs. Both motifs occur in DNase sensitive CGIs of K562  
630 and other cell lines (Supplement figure 1a). In contrast to motif 7, motif 10 exhibits a  
631 marked DNase-seq footprint profile in CGI-associated promoters. c) Motif co-occurrence  
632 odds ratio matrix in DNase-sensitive CGIs. The odds ratio is the ratio of observed motif  
633 co-occurrence divided by what is expected if motifs were distributed by chance. d)  
634 Metagene profile, generated by Homer package, for all CGIs, motif 7 and 10 shown  
635 relative to the gene bodies. Annotation enrichment scores in the genome were  
636 calculated using the cumulative hypergeometric distribution method found in the Homer  
637 package.

### 638 **Figure 2 CGCG elements recruit RNA polymerase 2 and activate reporter** 639 **expression**

640 a) Firefly reporter activity driven by motif 7 and 10. b) The structure of human *DENR*  
641 promoter and promoter fragments used for reporter studies. *DENR* promoter  
642 encompasses three highly conserved copies of the CGCG elements. The ENCODE  
643 POL2 ChIP-seq performed on HEK 293T cells shown in the bottom demarcates the

644 POL2 occupancy in the region. c) Reporter activity of the corresponding *DENR*  
645 fragments as described in section b of this figure. d) POL2-ChIP using the wild-type  
646 (TCTCGCGAGA) and mutant (TCTCICGAGA) reporter construct. Human *HPRT*  
647 promoter was used as a positive control. e) The effect of  $\alpha$ -amanitin on TCTCGCGAGA-  
648 driven firefly reporter. f) CRISPR/Cas9 double-nickase strategy to target CGCG  
649 elements in the *DENR* promoter. Ribbon plots show Sanger sequences of parental and  
650 edited alleles in a clone that contained a microdeletion in the *DENR* promoter. g) The  
651 resulting genome editing critically affected DENR transcription as assayed by RT-PCR  
652 and quantitative RT-PCR. This reduction in transcription resulted in lower DENR protein  
653 levels as determined by immunoblotting. Data are represented as the mean of three  
654 replicates  $\pm$  SD.

655 **Figure 3 CGCG elements promote bidirectional gene expression in the LuBiDi**  
656 **reporter system**

657 a) The structure of the LuBiDi reporter construct and the cloning site. b) A copy of the  
658 TCTCGCGAGA motif inserted in the LuBiDi construct was sufficient to activate the  
659 expression of both firefly and Renilla reporters. Flank-exchanged (AGACGCGTCT), G  
660 to T transversion mutation (TCTCICGAGA) and an insertion mutation in the middle of  
661 CGCG (TCTCGACGAGA) abolished the dual activation. c) The frequency of common  
662 CGCG element sequence variants observed in the human genome. d) The bidirectional  
663 promoter activity of a few CGCG element naturally-occurring variants. e) Promoter  
664 activities of reporter genes were associated with the copy number of TATCGCGAGA

665 motif present in the LuBiDi. f) Corresponding transcript levels from reporters in section  
666 “e” of this figure.

667 **Figure 4 CGCG elements are transcriptionally active in CpG islands and**  
668 **methylation abolishes its activity**

669 a) CGCG elements that occur in CGIs mark DNase-seq footprint in DNase-sensitive  
670 regions and associated with divergent plus and minus GRO-Cap transcripts in K562 cell  
671 line. The occupancy of POL2 on CGCG elements in CGIs as gauged by ENCODE  
672 POL2 ChIP-seq performed in K562 cell line. ENCODE WGBS methylation data for K562  
673 cell line showed the percentage of CpG methylation in CGIs and non-CGI sites. b)  
674 TCTCGCGAGA was inserted into a CpG-free Lucia reporter construct. The construct  
675 was methylated using M.SssI CpG methyltransferase and SAM as the methyl donor. c)  
676 Methylation of TCTCGCGAGA in the construct assessed by agarose gel analyses after  
677 digestion with NheI and BstUI enzymes. BstUI restriction enzyme recognizes non-  
678 methyl CG/CG sequence and performs a blunt cut (/ indicates the BstUI blunt cut site).  
679 d) The reporter construct containing methylated TCTCGCGAGA did not activate Lucia  
680 activity. Data are represented as the mean of three replicates  $\pm$  SD. e) Oligonucleotide  
681 pull-down followed by immunoblotting for Kaiso protein. f) Ectopic transient (72h)  
682 overexpression of Kaiso protein in HEK293T cells did not alter DENR protein levels.

683 **Figure 5 CGCG element in CGI promoters drives gene expression**

684 a) The bidirectional promoter of *POLR1C/YIPF3* gene pairs contains a conserved  
685 CGCG element between annotated TSSs. b) The *ZZZ3* promoter contains three copies  
686 of CGCG elements. Although this promoter is annotated as unidirectional, the GRO-Cap

687 analysis indicated associated divergent transcripts on the opposite strand. Wild-type  
688 fragment of this promoter that contains these three elements, but not the flank-  
689 exchanged mutants, confer bidirectional activation of reporter genes. c) The promoter of  
690 *PRDX1* gene contains both TATA-box and a CGCG element. GRO-Cap signals show a  
691 major TSS 26 nucleotides downstream of the TATA box. Promoter activity associated  
692 with this promoter structure indicated that increased directional promoter activity  
693 depended on the arrangement of the TATA box. Disruption of TATA-box (CCTA)  
694 attenuated this directional activity and the flank-exchanged mutant of the CGCG  
695 element abrogated the reporter activity. d) Start-seq data analysis of CGCG elements in  
696 the mouse genome. CGCG elements occur mostly within 50bp of sense and anti-sense  
697 Start-seq TSSs. Data are represented as the mean of three replicates  $\pm$  SD.

698 **Figure 6 CGCG element is associated with bidirectional transcription start sites.**

699 a) The location of gene-specific primers (GSP) used in our 5' RACE experiments to  
700 identify bidirectional TSSs in the LuBiDi based reporter constructs. Firefly and Renilla  
701 primers were designed 199 and 259bp away from the BglII cloning site, respectively. b)  
702 Agarose gel image of firefly and Renilla RACE PCR products for the LuBiDi constructs  
703 containing none or one copy of TCTCGCGAGA. GFP transcript was used as an internal  
704 control for the RACE experiment. c) TSS were determined for the LuBiDi construct  
705 containing a copy of the TCTCGCGAGA motif. TSS locations are indicated in nucleotide  
706 relative to the CGCG element. The sequence of +1 nucleotide and flanking five  
707 nucleotides are also shown on major TSSs. d) Divergent TSS for the LuBiDi construct  
708 that contained a TATA-box and a CGCG element from the *PRDX1* promoter. TSS

709 positions are indicated in nucleotide relative to the nearest feature (the CGCG element  
710 or the TATA-box). Note that positive TSS counts were used for the Renilla transcripts  
711 and negative numbers for the firefly transcripts. The number of sequenced clones for  
712 each reporter constructs are indicated above coding regions.

713



714 **Tables**

| <b>Term</b>                                                         | <b>P-value</b> | <b>FDR</b> | <b>Enrichment (N, B, n, b)</b> |
|---------------------------------------------------------------------|----------------|------------|--------------------------------|
| nuclear-transcribed mRNA catabolic process, nonsense-mediated decay | 1.21E-08       | 1.71E-04   | 5.45 (13906,109,398,17)        |
| Co-translational protein targeting to membrane                      | 2.57E-08       | 1.82E-04   | 5.96 (13906,88,398,15)         |
| mRNA metabolic process                                              | 1.97E-07       | 9.26E-04   | 2.43 (13906,576,398,40)        |
| amide biosynthetic process                                          | 2.77E-07       | 9.80E-04   | 3.31 (13906,253,398,24)        |
| protein targeting to ER                                             | 3.26E-07       | 9.21E-04   | 5.32 (13906,92,398,14)         |
| establishment of protein localization to endoplasmic reticulum      | 4.89E-07       | 1.15E-03   | 5.15 (13906,95,398,14)         |
| protein targeting to membrane                                       | 5.69E-07       | 1.15E-03   | 4.21 (13906,141,398,17)        |
| SRP-dependent co-translational protein targeting to membrane        | 6.11E-07       | 1.08E-03   | 5.47 (13906,83,398,13)         |
| protein localization to endoplasmic reticulum                       | 1.34E-06       | 2.10E-03   | 4.75 (13906,103,398,14)        |
| nuclear-transcribed mRNA catabolic process                          | 3.01E-06       | 4.25E-03   | 3.57 (13906,176,398,18)        |

715 **Table 1** Top GO terms for genes whose promoters contain CGCG elements. FDR:

716 False Discovery Rate. Please see methods section for the definition of N, B, n and b

717 variables.

718

| <b>Annotated configuration</b> | <b>CGCG elements</b> | <b>Percent</b> |
|--------------------------------|----------------------|----------------|
| Unidirectional coding          | 364                  | 80             |
| Bidirectional coding pair      | 22                   | 5              |
| Unidirectional non-coding      | 58                   | 13             |
| Non-coding and coding pair     | 9                    | 2              |

719 **Table 2** Frequency of the CGCG elements in annotated promoters

720 **Supplementary Figures**

721 **Figure 1 The CGCG element (motif 10) is associated with DNase-seq footprint in**  
722 **different cell lines.**

723 a) ENCODE DNase-seq footprints of motif 7 and 10 for available cell lines. b)  
724 TCTCGCGAGA motif occurs within 50bp of annotated TSSs in the human and mouse  
725 genomes.

726 **Figure 2 The CGCG element promote simultaneous expression of GFP and**  
727 **mCherry genes in the pmCGFP reporter construct**

728 a) The pmCGFP bidirectional reporter structure. b) The fluorescence image of  
729 HEK293T cells transfected with pmCGFP constructs containing 0, 1 or 3 copies of  
730 TCTCGCGAGA motif after 24 hours. CMV-driven BFP expression was used as an  
731 internal control c) Immunoblots showing levels of GFP and mCherry expression 24 and  
732 48 hours post transfection. d) Time-lapse imaging of HEK293T cells transfected with the  
733 pmCGFP containing three copies of TCTCGCGAGA for 24 hours shows that both  
734 reporters are simultaneously expressed few hours after transfection. Scale bar is 100  
735  $\mu$ m. e) CGCG element confer bidirectional expression of GFP and H2b-mCherry  
736 reporter genes in HEK293T. Time-Lapse images of HEK293T cell line transfected with a  
737 pmCGFP-H2b (h2b-mcherry fused gene) reporter. Please note delayed H2b-mCherry  
738 signals as the fused mCherry protein is being trafficked into the nucleus. f) Images of  
739 NMuMG mouse cells transfected with pmCGFP-H2b construct containing either 3  
740 copies of wild-type TCTCGCGAGA motif or 3 copies of TCTCICGAGA mutant motif.

741 **Figure 3 REACTOME Interaction network analysis of CGCG containing promoters.**

742 An analysis of genes that contain CGCG elements in their promoters found that most of  
743 these genes can be clustered into distinct functional groups as indicated in the figure.

744 **Figure 4 CGCG elements in the DENR promoter promote divergent transcription**

745 The CGCG elements in the *DENR* promoter, regardless of the insert direction, activated  
746 bidirectional reporter genes. Insertion of an “A” in the center of CGCG elements  
747 eliminated the promoter activity.

748 **Figure 5 CGCG elements are enriched in Ribosomal protein promoters**

749 Aligned sequences of CGCG elements and flanking regions in the promoters of  
750 Ribosomal proteins genes. Ribosomal genes that contain CGCG element are devoid of  
751 TCT motif.

752 **Supplementary video**

753 TCTCGCGAGA motif activated the simultaneous expression of both GFP and mCherry  
754 fluorescent reporters.

755 **Reference:**

- 756 1. Levine, M., Cattoglio, C. & Tjian, R. Looping back to leap forward: transcription  
757 enters a new era. *Cell* **157**, 13-25 (2014).
- 758 2. Lee, T.I. & Young, R.A. Transcriptional regulation and its misregulation in  
759 disease. *Cell* **152**, 1237-51 (2013).
- 760 3. Roeder, R.G. & Rutter, W.J. Multiple forms of DNA-dependent RNA polymerase  
761 in eukaryotic organisms. *Nature* **224**, 234-7 (1969).
- 762 4. Roeder, R.G. The complexities of eukaryotic transcription initiation: regulation of  
763 preinitiation complex assembly. *Trends Biochem Sci* **16**, 402-8 (1991).
- 764 5. Juven-Gershon, T., Hsu, J.Y., Theisen, J.W. & Kadonaga, J.T. The RNA  
765 polymerase II core promoter - the gateway to transcription. *Curr Opin Cell Biol*  
766 **20**, 253-9 (2008).
- 767 6. Smale, S.T. & Kadonaga, J.T. The RNA polymerase II core promoter. *Annu Rev*  
768 *Biochem* **72**, 449-79 (2003).
- 769 7. Sandelin, A. *et al.* Mammalian RNA polymerase II core promoters: insights from  
770 genome-wide studies. *Nat Rev Genet* **8**, 424-36 (2007).
- 771 8. Yang, C., Bolotin, E., Jiang, T., Sladek, F.M. & Martinez, E. Prevalence of the  
772 initiator over the TATA box in human and yeast genes and identification of DNA  
773 motifs enriched in human TATA-less core promoters. *Gene* **389**, 52-65 (2007).
- 774 9. Deng, W. & Roberts, S.G. A core promoter element downstream of the TATA box  
775 that is recognized by TFIIB. *Genes Dev* **19**, 2418-23 (2005).
- 776 10. Lim, C.Y. *et al.* The MTE, a new core promoter element for transcription by RNA  
777 polymerase II. *Genes Dev* **18**, 1606-17 (2004).
- 778 11. Anish, R., Hossain, M.B., Jacobson, R.H. & Takada, S. Characterization of  
779 transcription from TATA-less promoters: identification of a new core promoter  
780 element XCPE2 and analysis of factor requirements. *PLoS One* **4**, e5103 (2009).
- 781 12. Burke, T.W. & Kadonaga, J.T. The downstream core promoter element, DPE, is  
782 conserved from *Drosophila* to humans and is recognized by TAFII60 of  
783 *Drosophila*. *Genes Dev* **11**, 3020-31 (1997).
- 784 13. Deaton, A.M. & Bird, A. CpG islands and the regulation of transcription. *Genes*  
785 *Dev* **25**, 1010-22 (2011).
- 786 14. Gardiner-Garden, M. & Frommer, M. CpG islands in vertebrate genomes. *J Mol*  
787 *Biol* **196**, 261-82 (1987).
- 788 15. Zhu, J., He, F., Hu, S. & Yu, J. On the nature of human housekeeping genes.  
789 *Trends Genet* **24**, 481-4 (2008).
- 790 16. Wierstra, I. Sp1: emerging roles--beyond constitutive activation of TATA-less  
791 housekeeping genes. *Biochem Biophys Res Commun* **372**, 1-13 (2008).
- 792 17. Hargreaves, D.C., Horng, T. & Medzhitov, R. Control of inducible gene  
793 expression by signal-dependent transcriptional elongation. *Cell* **138**, 129-45  
794 (2009).
- 795 18. Yang, M.Q. *et al.* Genome-wide detection of a TFIID localization element from an  
796 initial human disease mutation. *Nucleic Acids Res* **39**, 2175-87 (2011).

- 797 19. Core, L.J., Waterfall, J.J. & Lis, J.T. Nascent RNA Sequencing Reveals  
798 Widespread Pausing and Divergent Initiation at Human Promoters. *Science* **322**,  
799 1845-1848 (2008).
- 800 20. Seila, A.C. *et al.* Divergent transcription from active promoters. *Science* **322**,  
801 1849-51 (2008).
- 802 21. Preker, P. *et al.* RNA exosome depletion reveals transcription upstream of active  
803 human promoters. *Science* **322**, 1851-4 (2008).
- 804 22. Haun, R.S., Moss, J. & Vaughan, M. Characterization of the human ADP-  
805 ribosylation factor 3 promoter. Transcriptional regulation of a TATA-less  
806 promoter. *J Biol Chem* **268**, 8793-800 (1993).
- 807 23. Wyrwicz, L.S., Gaj, P., Hoffmann, M., Rychlewski, L. & Ostrowski, J. A common  
808 cis-element in promoters of protein synthesis and cell cycle genes. *Acta Biochim*  
809 *Pol* **54**, 89-98 (2007).
- 810 24. Mikula, M. *et al.* Comprehensive analysis of the palindromic motif  
811 TCTCGCGAGA: a regulatory element of the HNRNPK promoter. *DNA Res* **17**,  
812 245-60 (2010).
- 813 25. Guo, G., Rodelsperger, C., Digweed, M. & Robinson, P.N. Regulation of fibrillin-1  
814 gene expression by Sp1. *Gene* **527**, 448-55 (2013).
- 815 26. Xie, X. *et al.* Systematic discovery of regulatory motifs in human promoters and 3'  
816 UTRs by comparison of several mammals. *Nature* **434**, 338-45 (2005).
- 817 27. Ioshikhes, I.P. & Zhang, M.Q. Large-scale human promoter mapping using CpG  
818 islands. *Nat Genet* **26**, 61-3 (2000).
- 819 28. Rozenberg, J.M. *et al.* All and only CpG containing sequences are enriched in  
820 promoters abundantly bound by RNA polymerase II in multiple tissues. *BMC*  
821 *Genomics* **9**, 67 (2008).
- 822 29. Butler, J.E. & Kadonaga, J.T. The RNA polymerase II core promoter: a key  
823 component in the regulation of gene expression. *Genes Dev* **16**, 2583-92 (2002).
- 824 30. Lavrarr, J.L. & Farnham, P.J. The Use of Transient Chromatin  
825 Immunoprecipitation Assays to Test Models for E2F1-specific Transcriptional  
826 Activation. *Journal of Biological Chemistry* **279**, 46343-46349 (2004).
- 827 31. Keding, C., Gniazdowski, M., Mandel, J.L., Jr., Gissinger, F. & Chambon, P.  
828 Alpha-amanitin: a specific inhibitor of one of two DNA-pendent RNA polymerase  
829 activities from calf thymus. *Biochem Biophys Res Commun* **38**, 165-71 (1970).
- 830 32. Ran, F.A. *et al.* Double nicking by RNA-guided CRISPR Cas9 for enhanced  
831 genome editing specificity. *Cell* **154**, 1380-9 (2013).
- 832 33. Core, L.J. *et al.* Analysis of nascent RNA identifies a unified architecture of  
833 initiation regions at mammalian promoters and enhancers. *Nat Genet* **46**, 1311-  
834 20 (2014).
- 835 34. Prokhortchouk, A. *et al.* The p120 catenin partner Kaiso is a DNA methylation-  
836 dependent transcriptional repressor. *Genes Dev* **15**, 1613-8 (2001).
- 837 35. Perissi, V., Jepsen, K., Glass, C.K. & Rosenfeld, M.G. Deconstructing  
838 repression: evolving models of co-repressor action. *Nat Rev Genet* **11**, 109-23  
839 (2010).

- 840 36. Raghav, S.K. *et al.* Integrative genomics identifies the corepressor SMRT as a  
841 gatekeeper of adipogenesis through the transcription factors C/EBPbeta and  
842 KAISO. *Mol Cell* **46**, 335-50 (2012).
- 843 37. Chen, Y. *et al.* Principles for RNA metabolism and alternative transcription  
844 initiation within closely spaced promoters. *Nat Genet* **48**, 984-94 (2016).
- 845 38. Carninci, P. *et al.* Genome-wide analysis of mammalian promoter architecture  
846 and evolution. *Nat Genet* **38**, 626-35 (2006).
- 847 39. Scruggs, B.S. *et al.* Bidirectional Transcription Arises from Two Distinct Hubs of  
848 Transcription Factor Binding and Active Chromatin. *Mol Cell* **58**, 1101-12 (2015).
- 849 40. Parry, T.J. *et al.* The TCT motif, a key component of an RNA polymerase II  
850 transcription system for the translational machinery. *Genes Dev* **24**, 2013-8  
851 (2010).
- 852 41. Kovalskaya, E., Buzdin, A., Gogvadze, E., Vinogradova, T. & Sverdlov, E.  
853 Functional human endogenous retroviral LTR transcription start sites are located  
854 between the R and U5 regions. *Virology* **346**, 373-8 (2006).
- 855 42. Denoeud, F. *et al.* Prominent use of distal 5' transcription start sites and  
856 discovery of a large number of additional exons in ENCODE regions. *Genome*  
857 *Research* **17**, 746-759 (2007).
- 858 43. Burke, T.W., Willy, P.J., Kutach, A.K., Butler, J.E. & Kadonaga, J.T. The DPE, a  
859 conserved downstream core promoter element that is functionally analogous to  
860 the TATA box. *Cold Spring Harb Symp Quant Biol* **63**, 75-82 (1998).
- 861 44. Emami, K.H., Jain, A. & Smale, S.T. Mechanism of synergy between TATA and  
862 initiator: synergistic binding of TFIID following a putative TFIIA-  
863 induced isomerization. *Genes & Development* **11**, 3007-3019 (1997).
- 864 45. Lister, R. *et al.* Highly integrated single-base resolution maps of the epigenome  
865 in Arabidopsis. *Cell* **133**, 523-36 (2008).
- 866 46. Ndlovu, M.N., Denis, H. & Fuks, F. Exposing the DNA methylome iceberg.  
867 *Trends Biochem Sci* **36**, 381-7 (2011).
- 868 47. Domcke, S. *et al.* Competition between DNA methylation and transcription  
869 factors determines binding of NRF1. *Nature* **528**, 575-579 (2015).
- 870 48. Di Vona, C. *et al.* Chromatin-wide profiling of DYRK1A reveals a role as a gene-  
871 specific RNA polymerase II CTD kinase. *Mol Cell* **57**, 506-20 (2015).
- 872 49. Goodrich, J.A. & Tjian, R. Unexpected roles for core promoter recognition factors  
873 in cell-type-specific transcription and gene regulation. *Nat Rev Genet* **11**, 549-58  
874 (2010).
- 875 50. Nguyen, V.T. *et al.* In vivo degradation of RNA polymerase II largest subunit  
876 triggered by alpha-amanitin. *Nucleic Acids Res* **24**, 2924-9 (1996).
- 877 51. Lee, T.I., Johnstone, S.E. & Young, R.A. Chromatin immunoprecipitation and  
878 microarray-based analysis of protein location. *Nat Protoc* **1**, 729-48 (2006).
- 879 52. Previs, M.J., Beck Previs, S., Gulick, J., Robbins, J. & Warshaw, D.M. Molecular  
880 mechanics of cardiac myosin-binding protein C in native thick filaments. *Science*  
881 **337**, 1215-8 (2012).

- 882 53. Quinlan, A.R. & Hall, I.M. BEDTools: a flexible suite of utilities for comparing  
883 genomic features. *Bioinformatics* **26**, 841-2 (2010).
- 884 54. Heinz, S. *et al.* Simple combinations of lineage-determining transcription factors  
885 prime cis-regulatory elements required for macrophage and B cell identities. *Mol*  
886 *Cell* **38**, 576-89 (2010).
- 887 55. Eden, E., Navon, R., Steinfeld, I., Lipson, D. & Yakhini, Z. GOrilla: a tool for  
888 discovery and visualization of enriched GO terms in ranked gene lists. *BMC*  
889 *Bioinformatics* **10**, 48 (2009).
- 890 56. Grant, C.E., Bailey, T.L. & Noble, W.S. FIMO: scanning for occurrences of a  
891 given motif. *Bioinformatics* **27**, 1017-8 (2011).
- 892



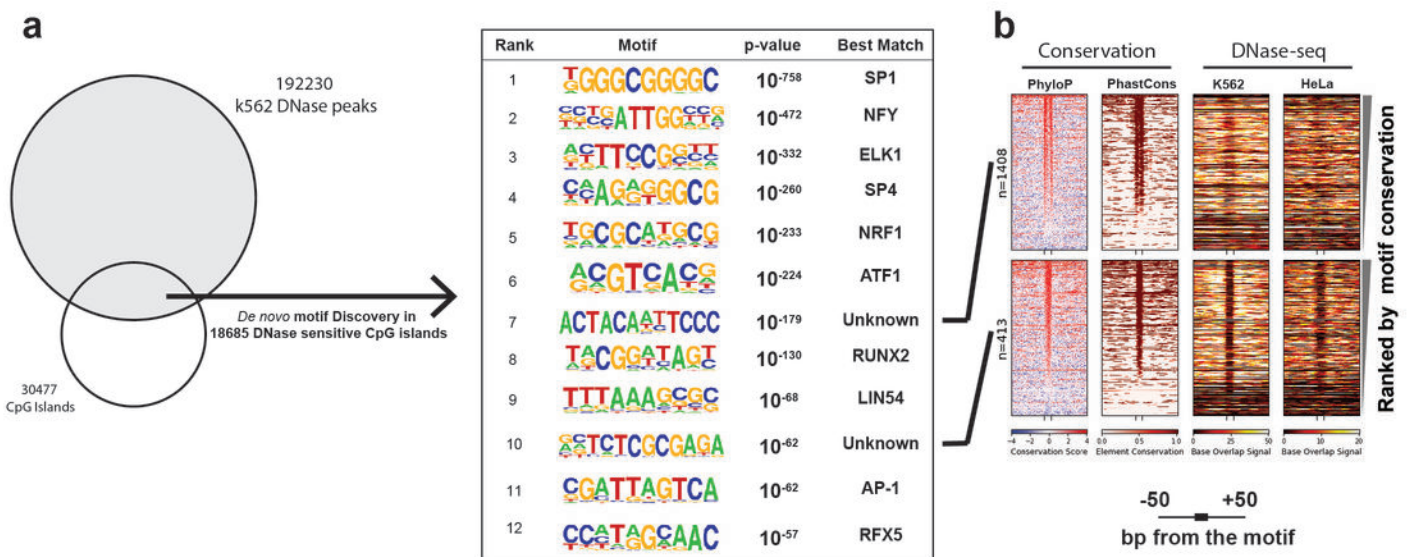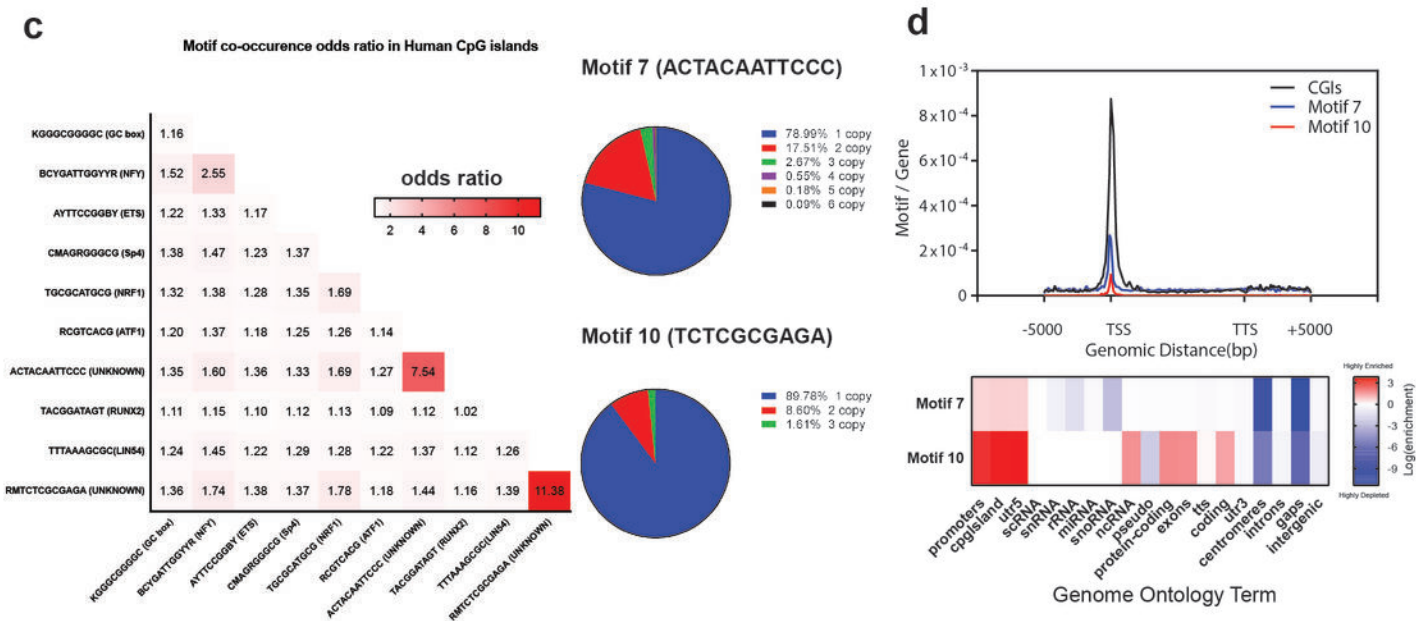



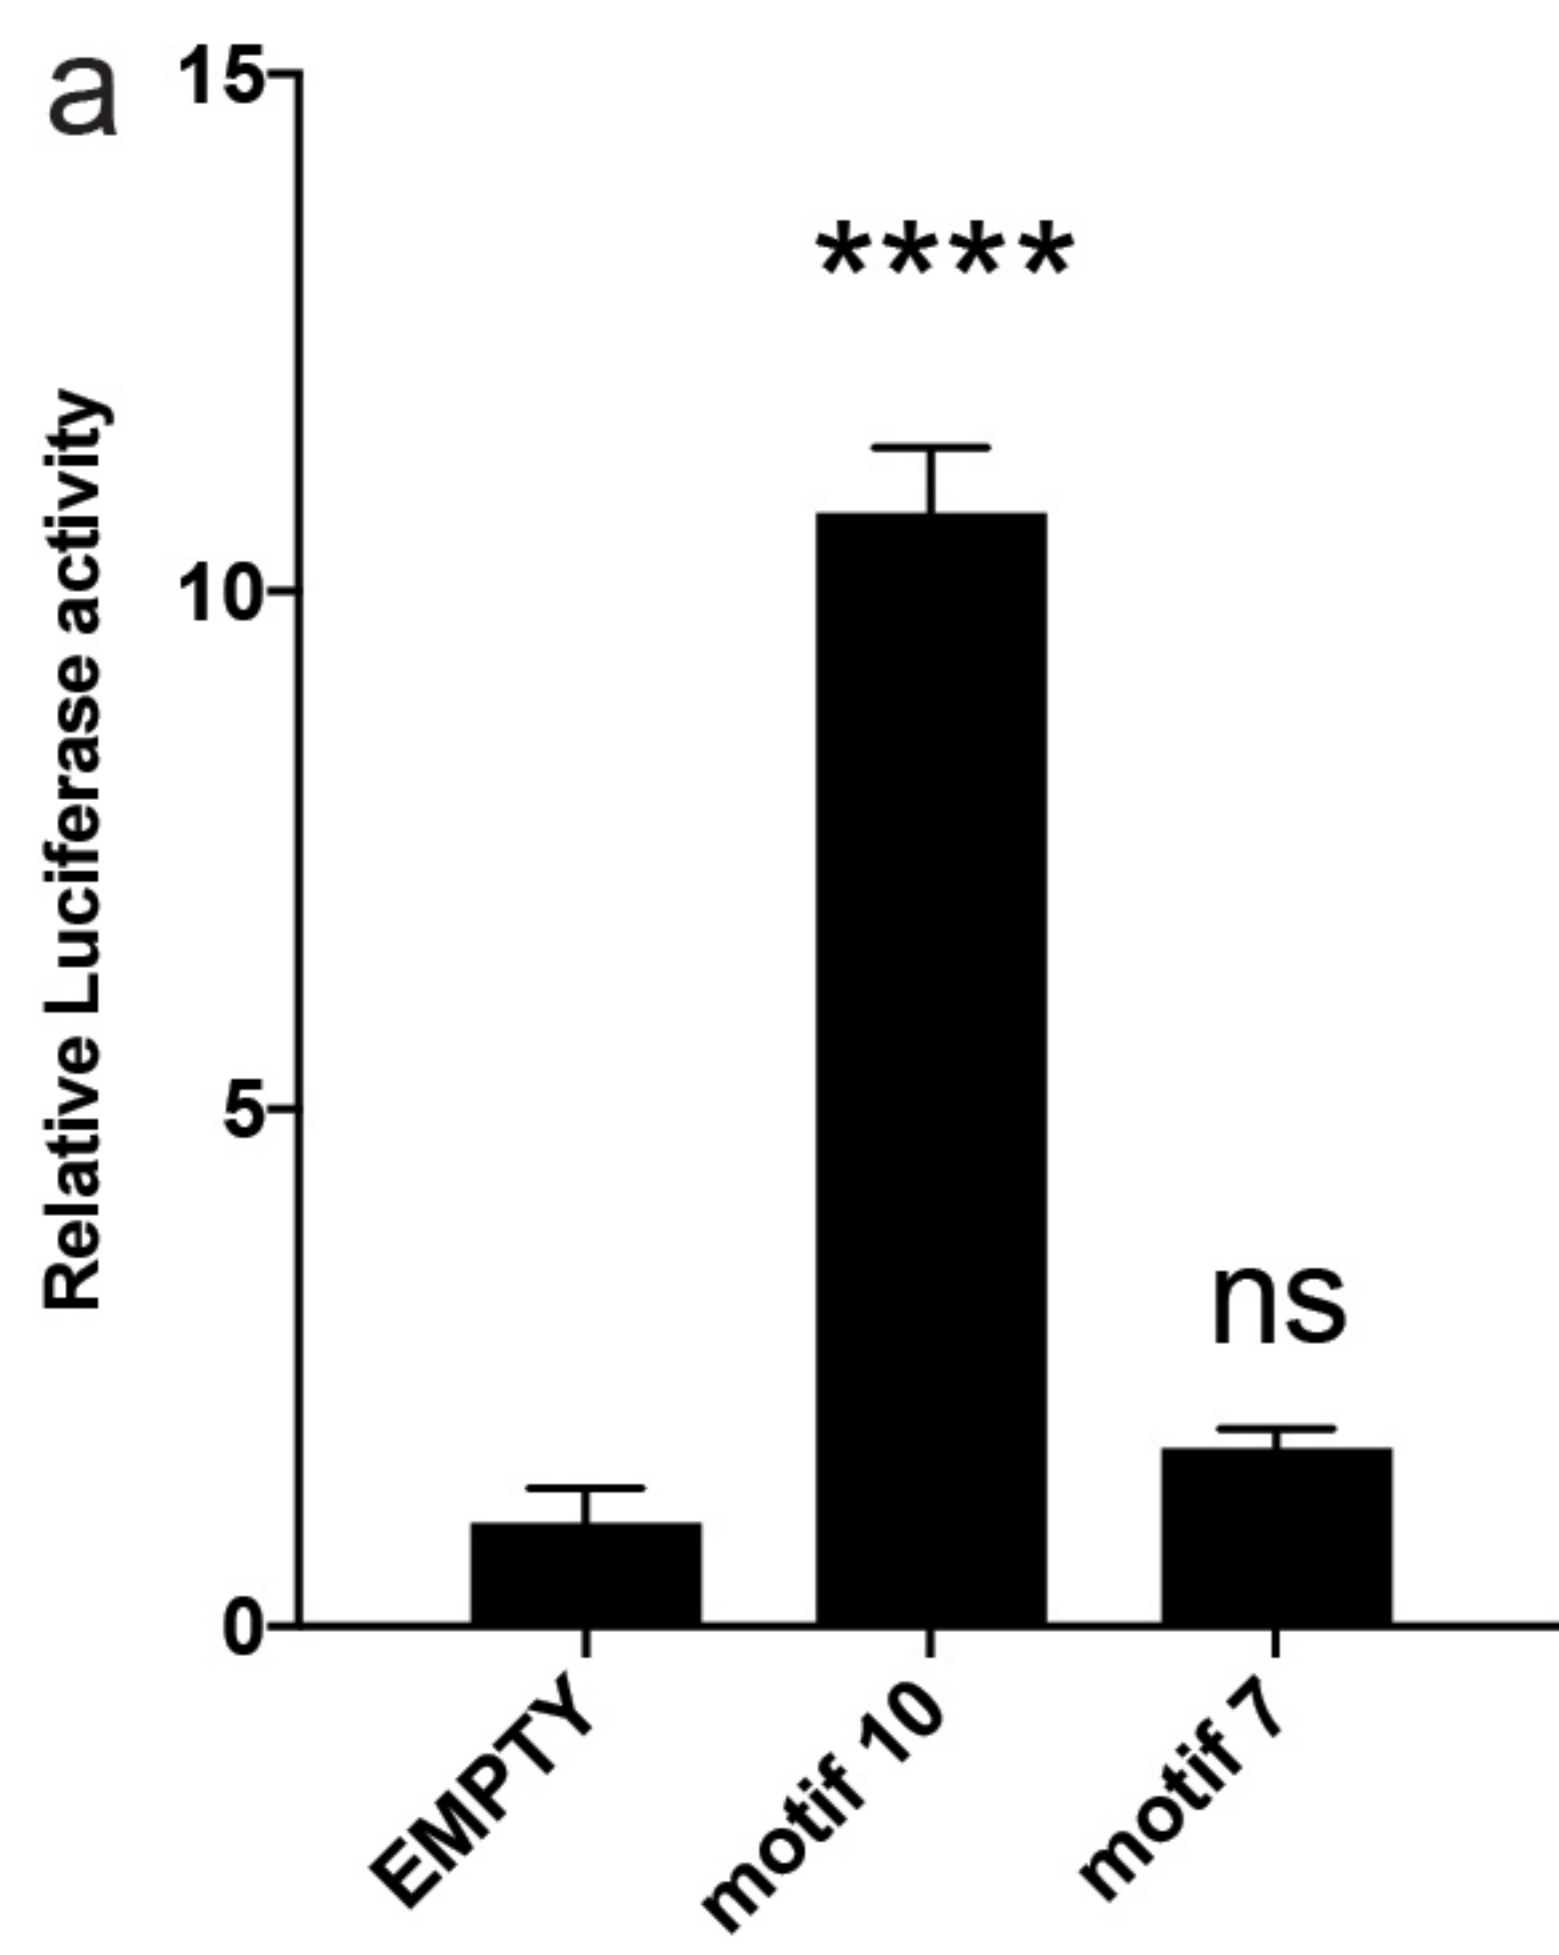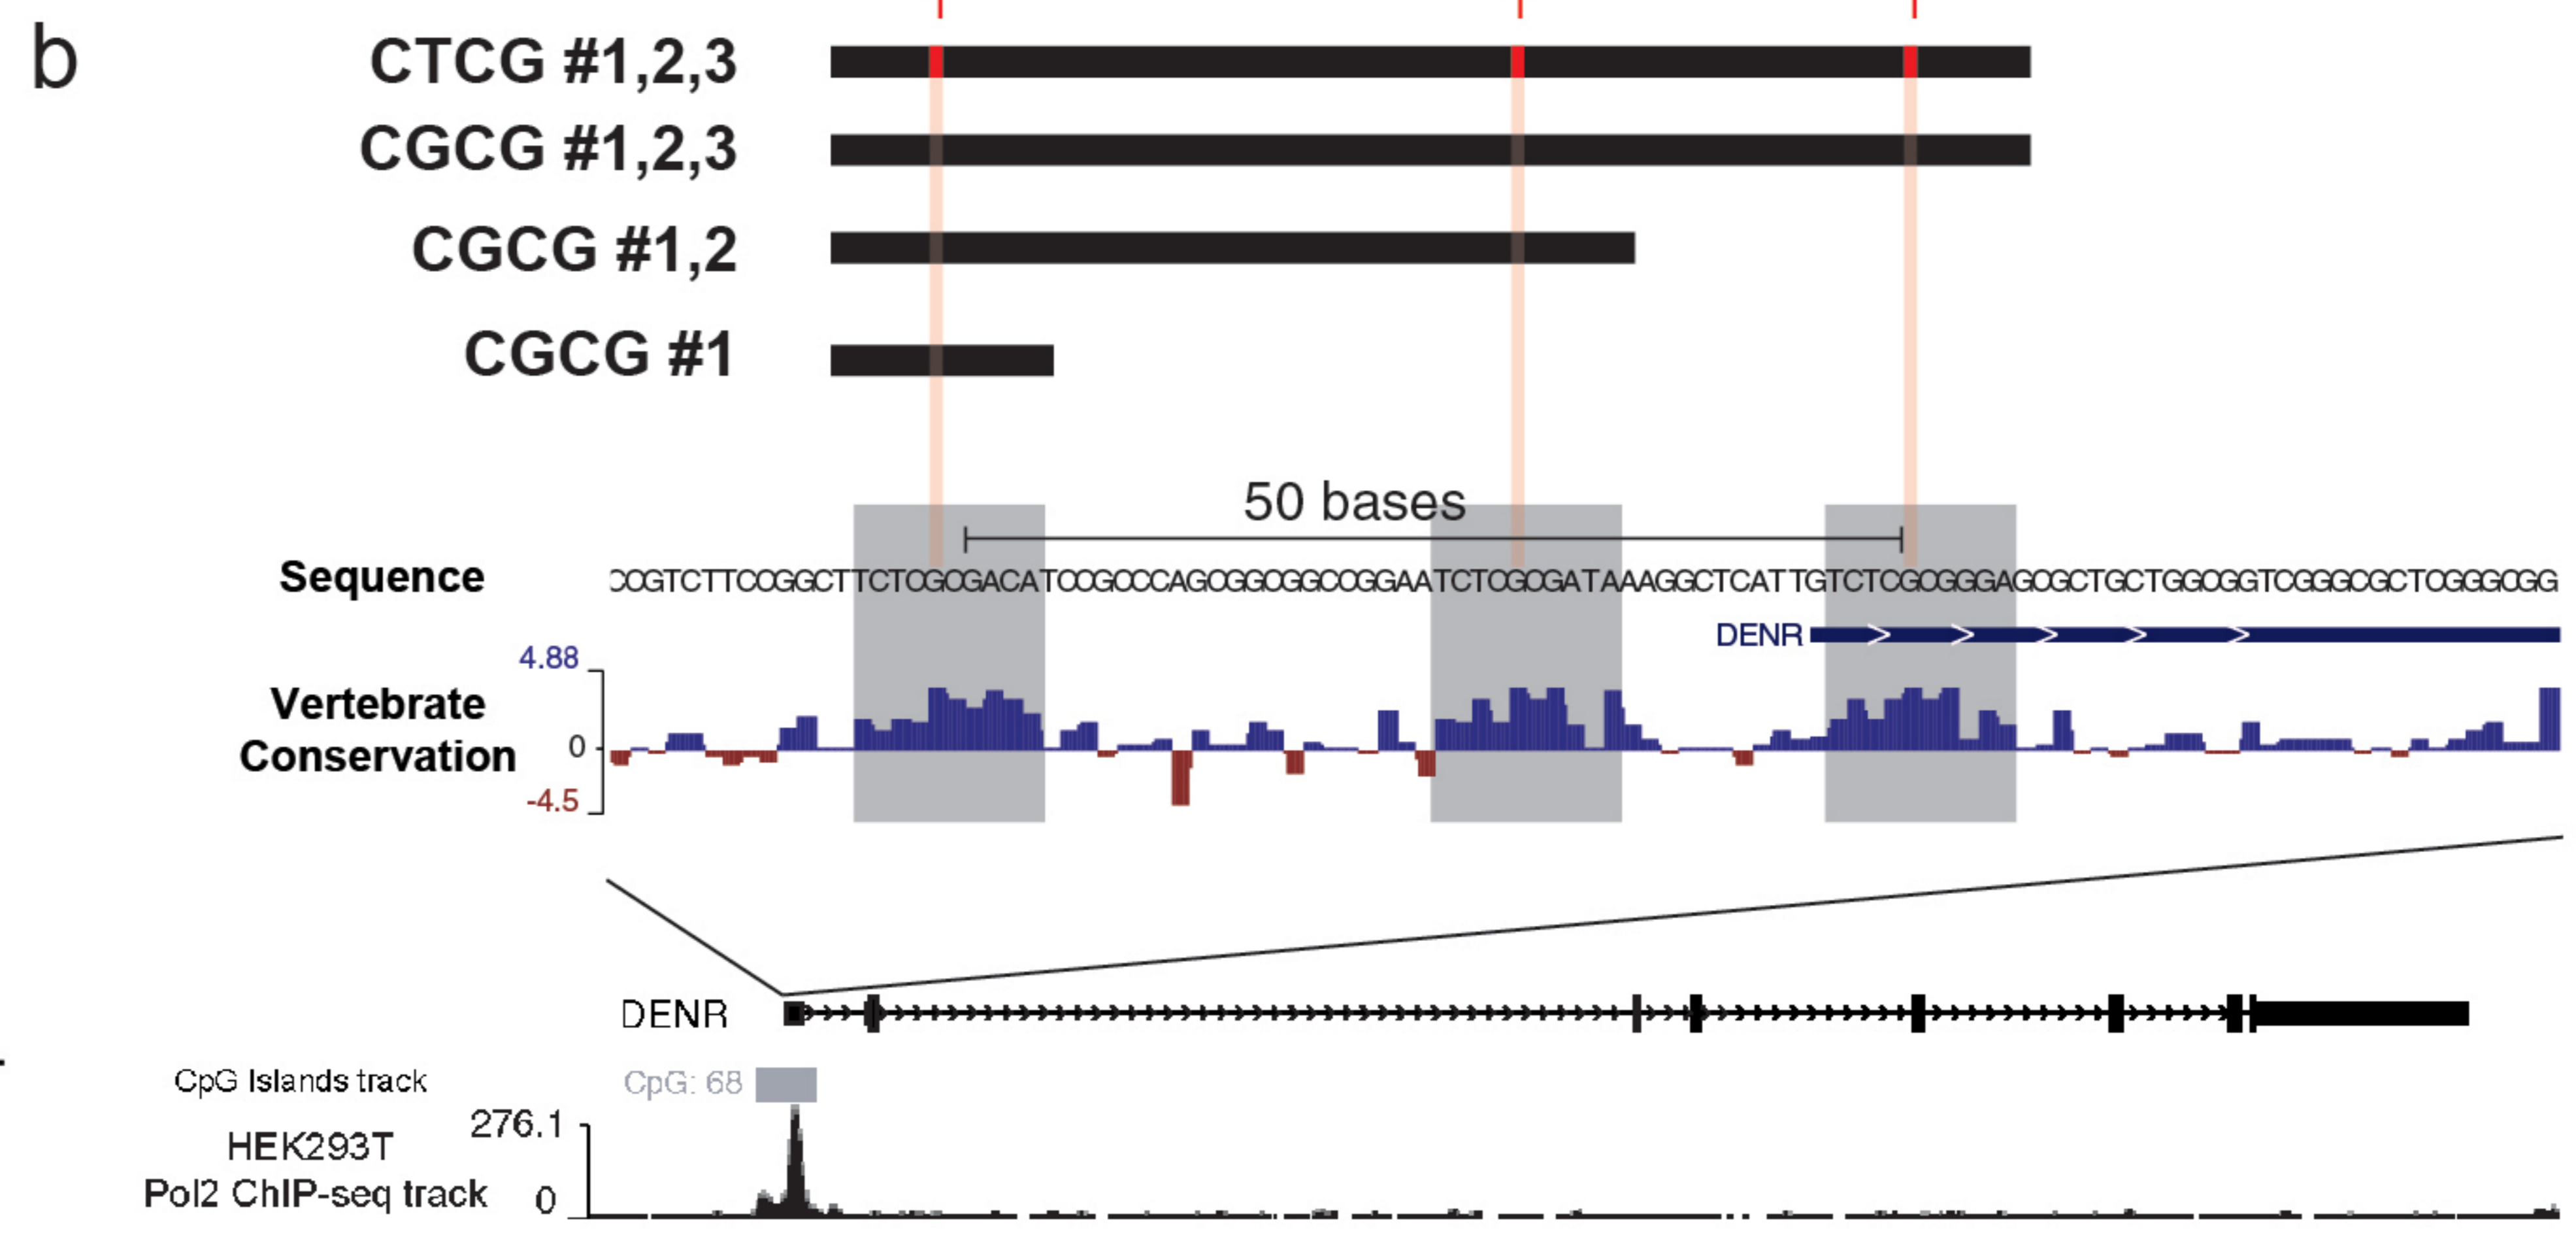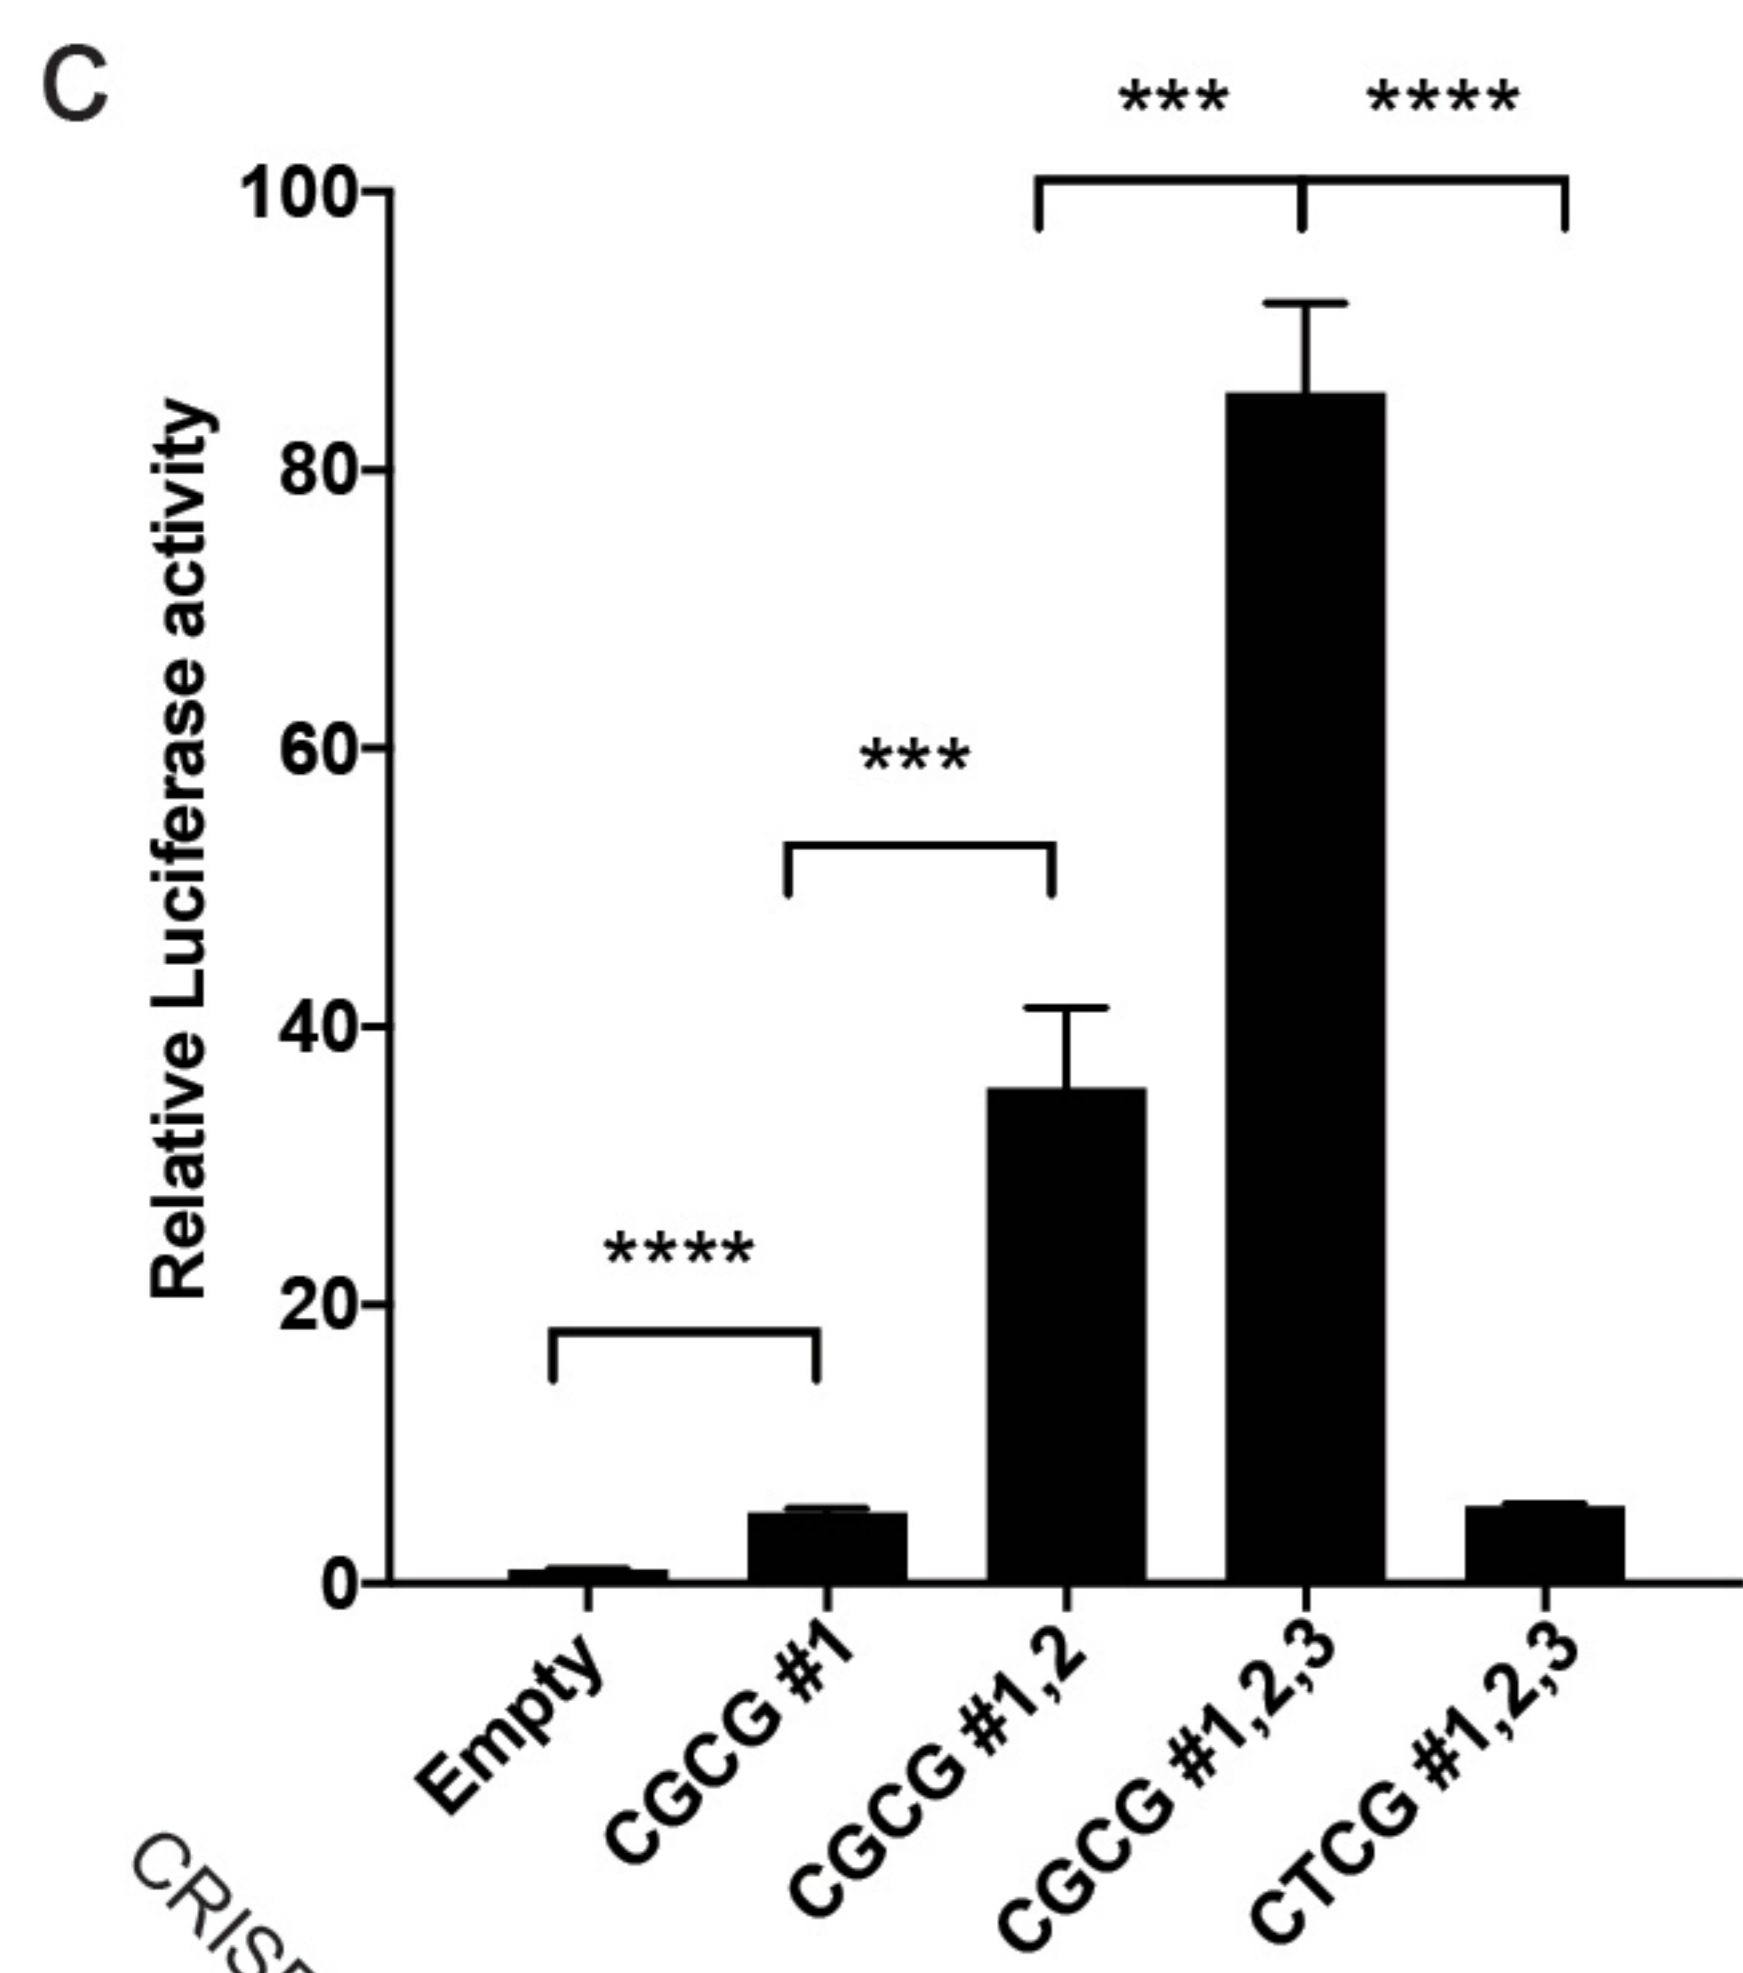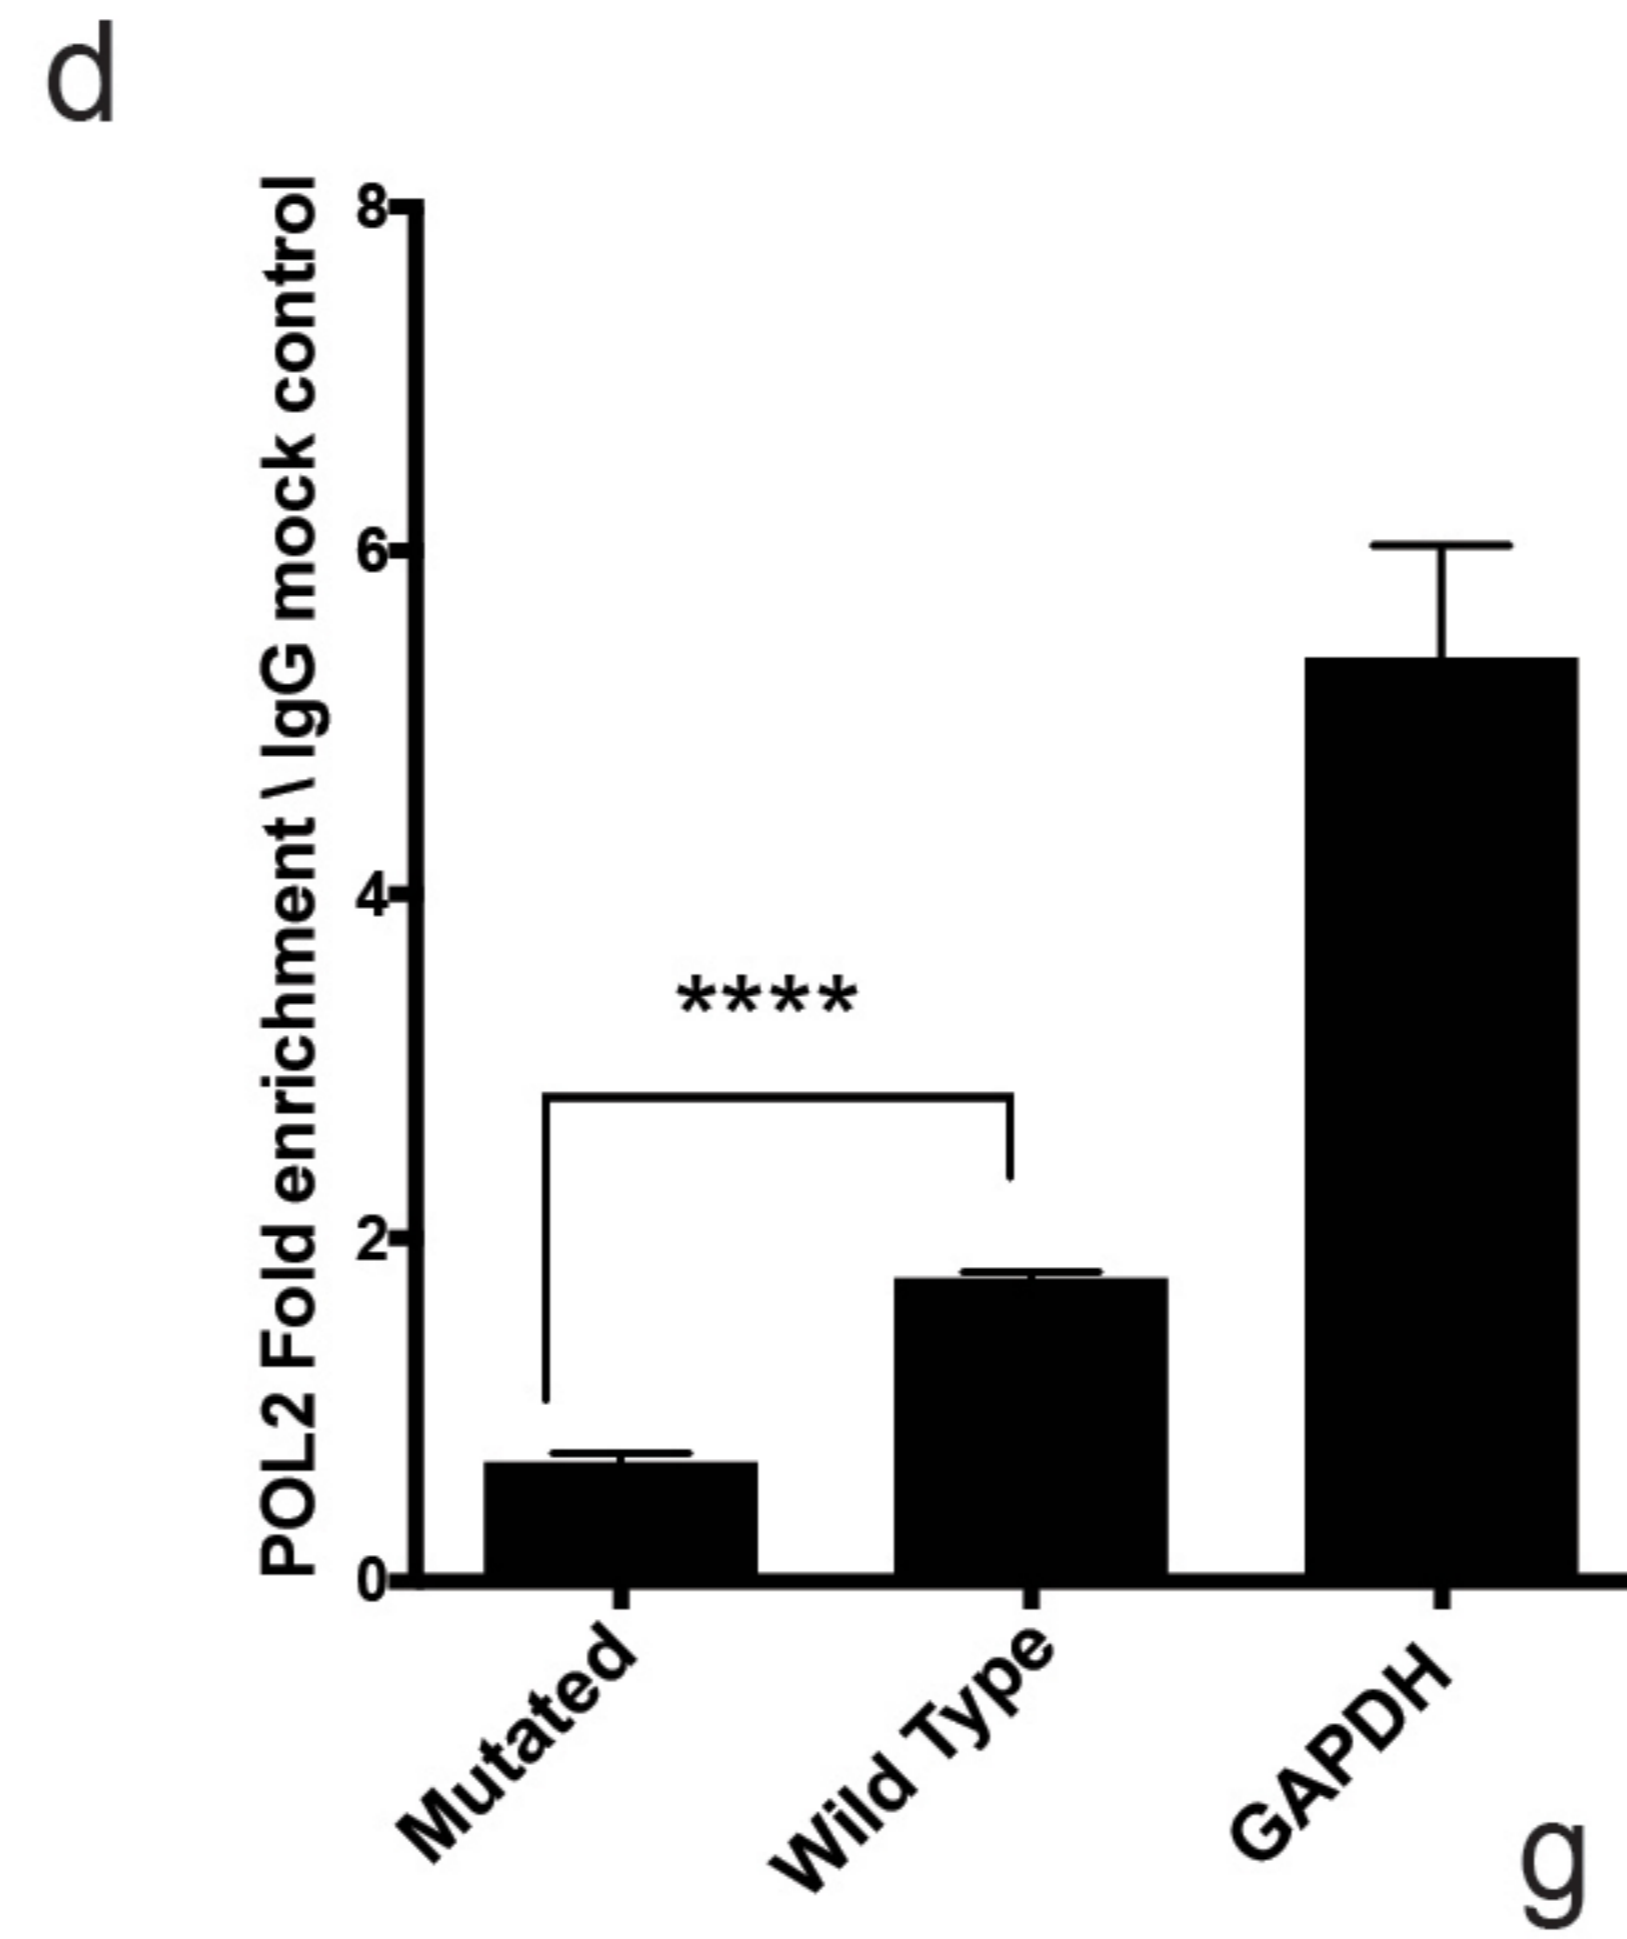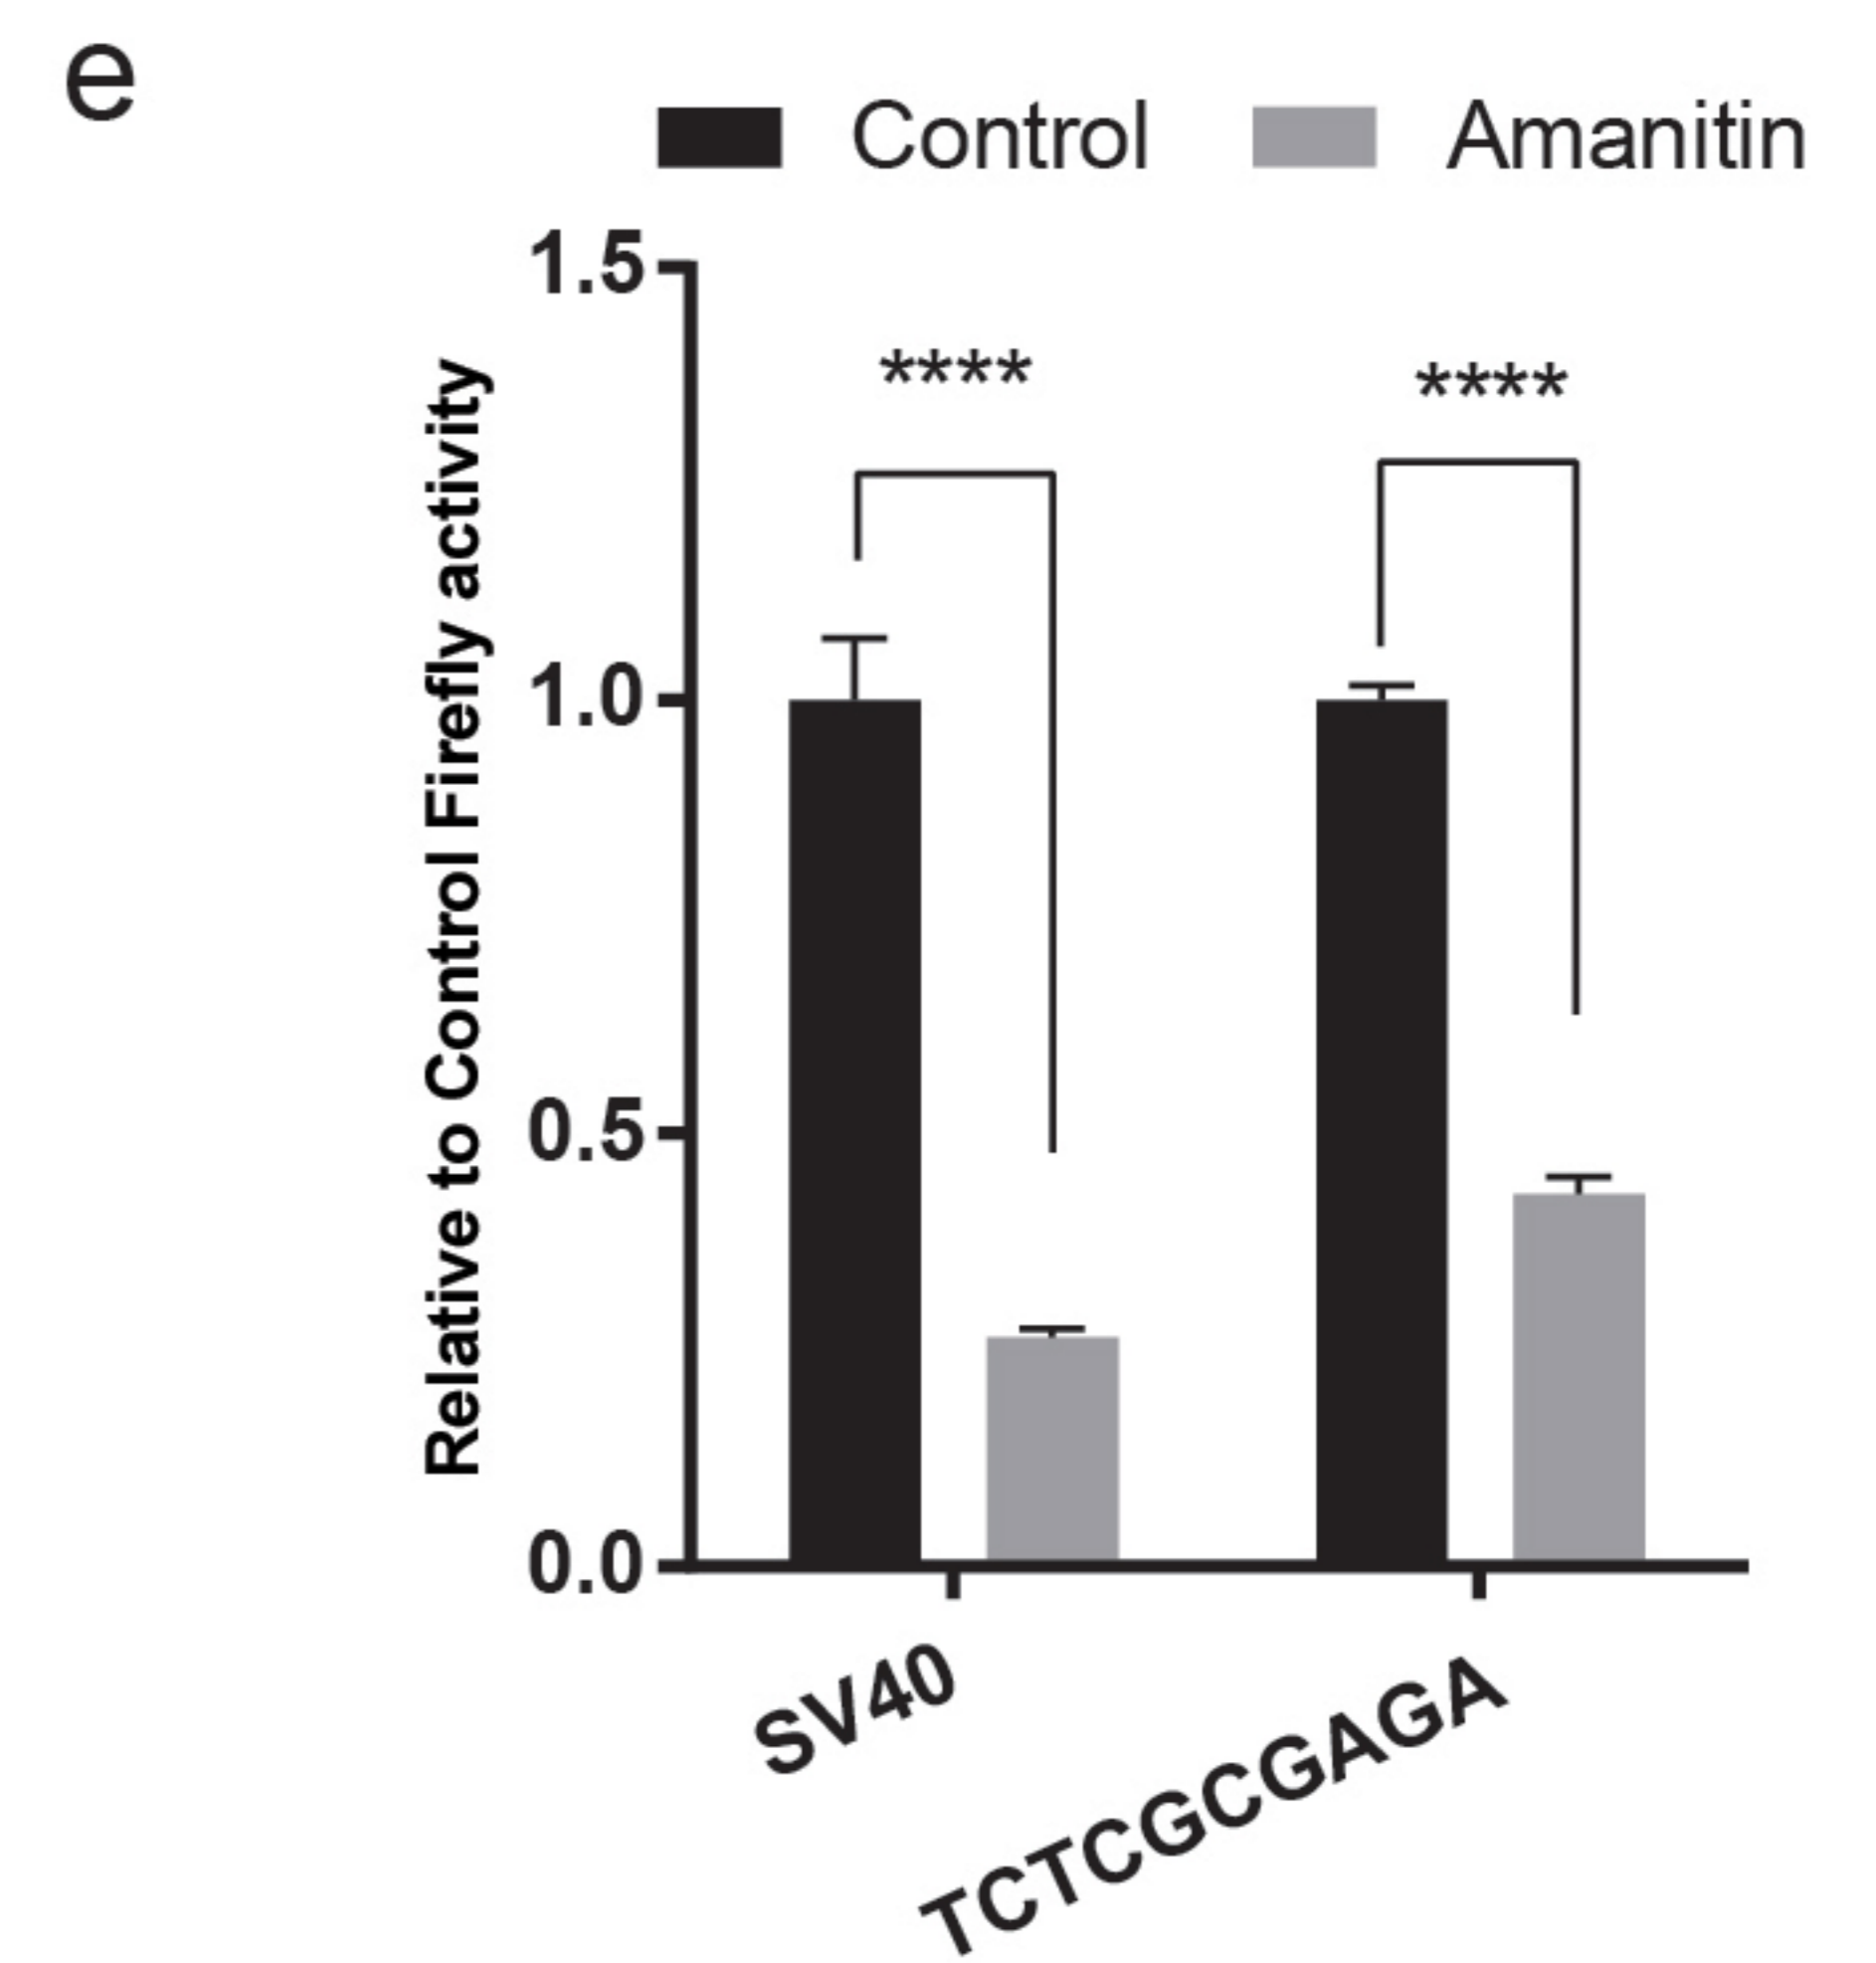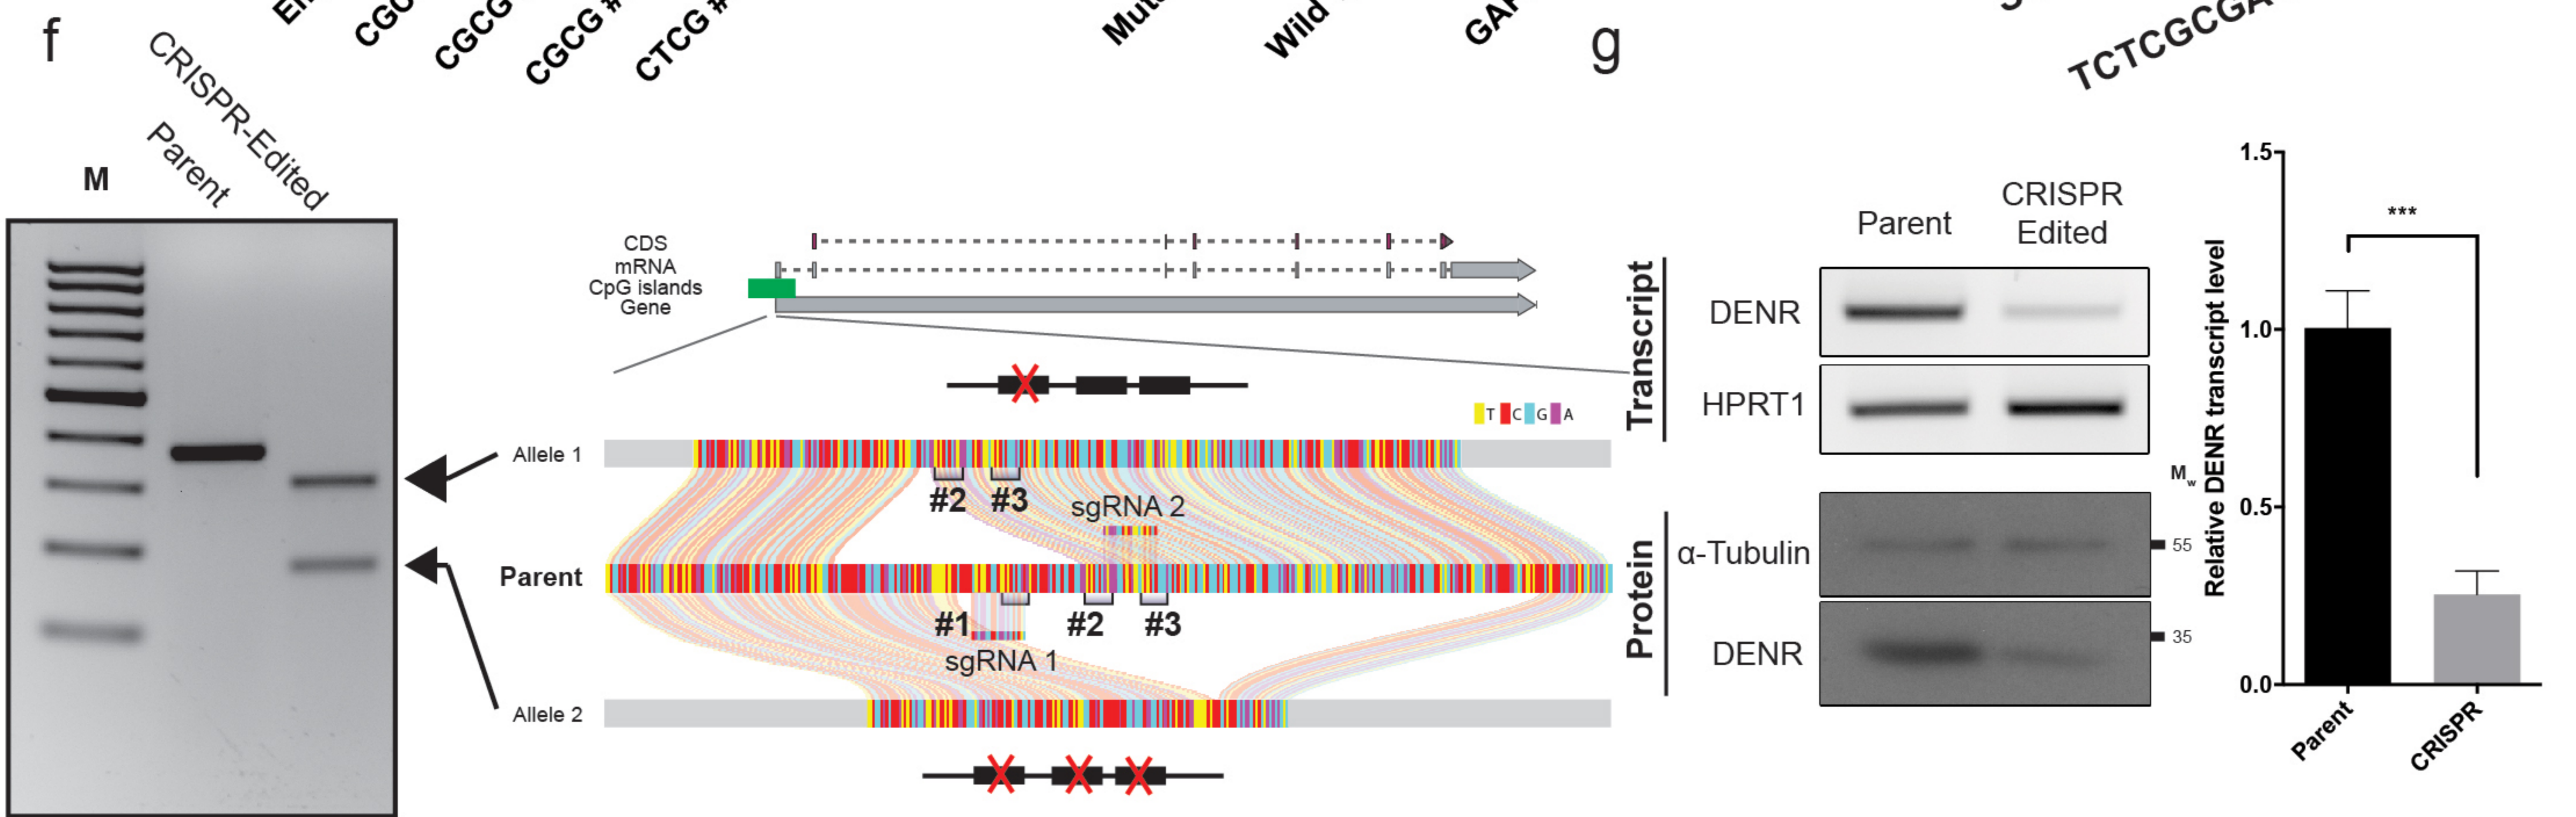



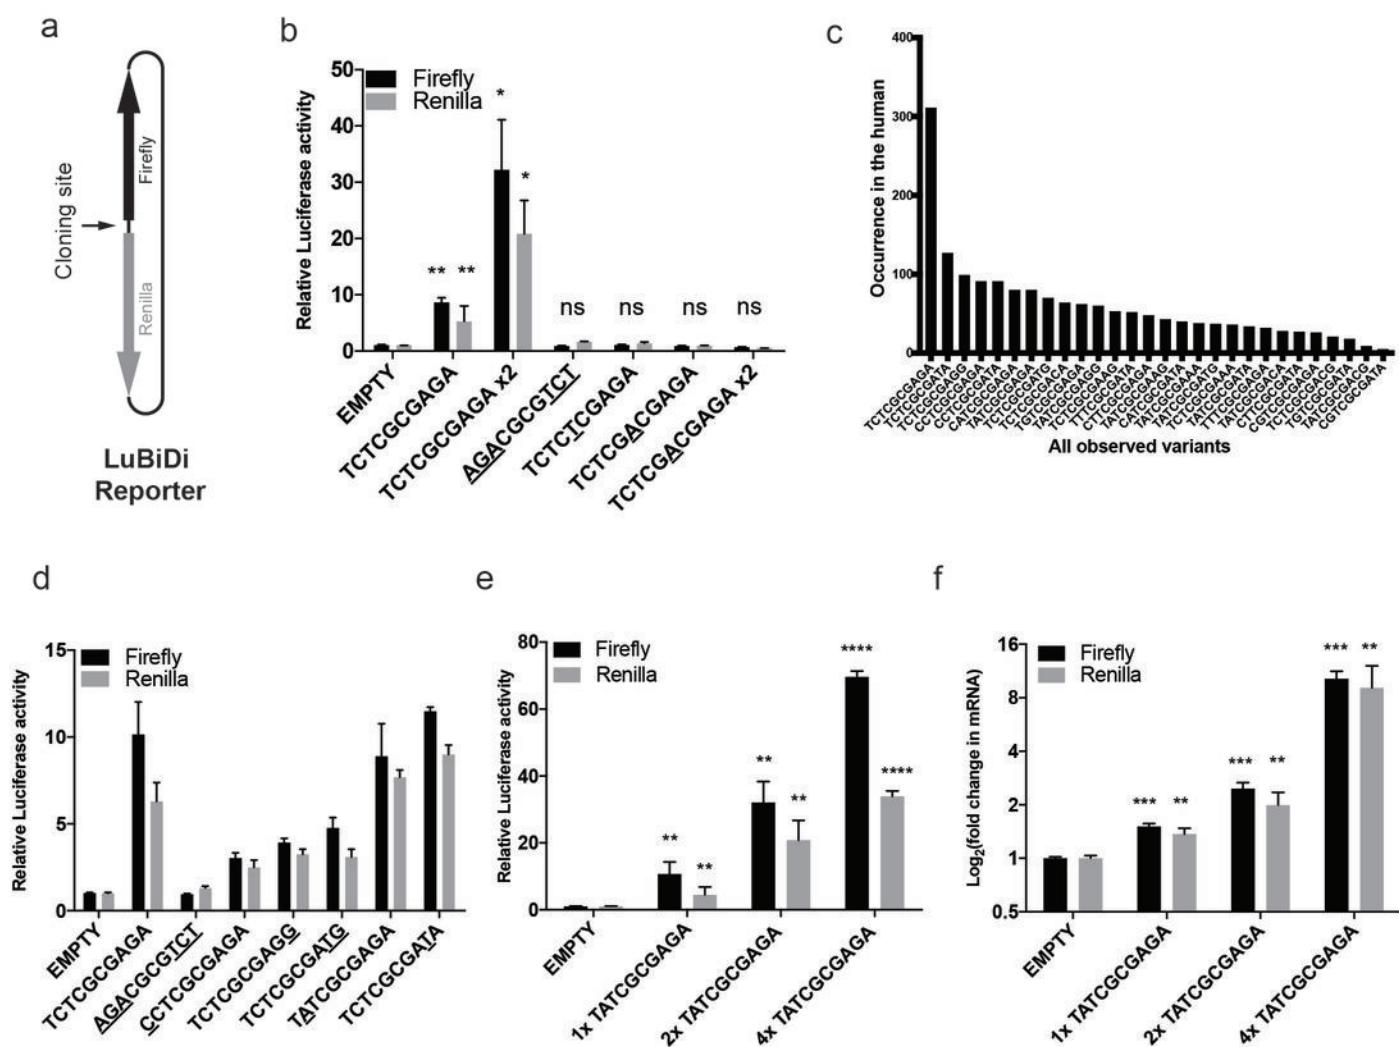

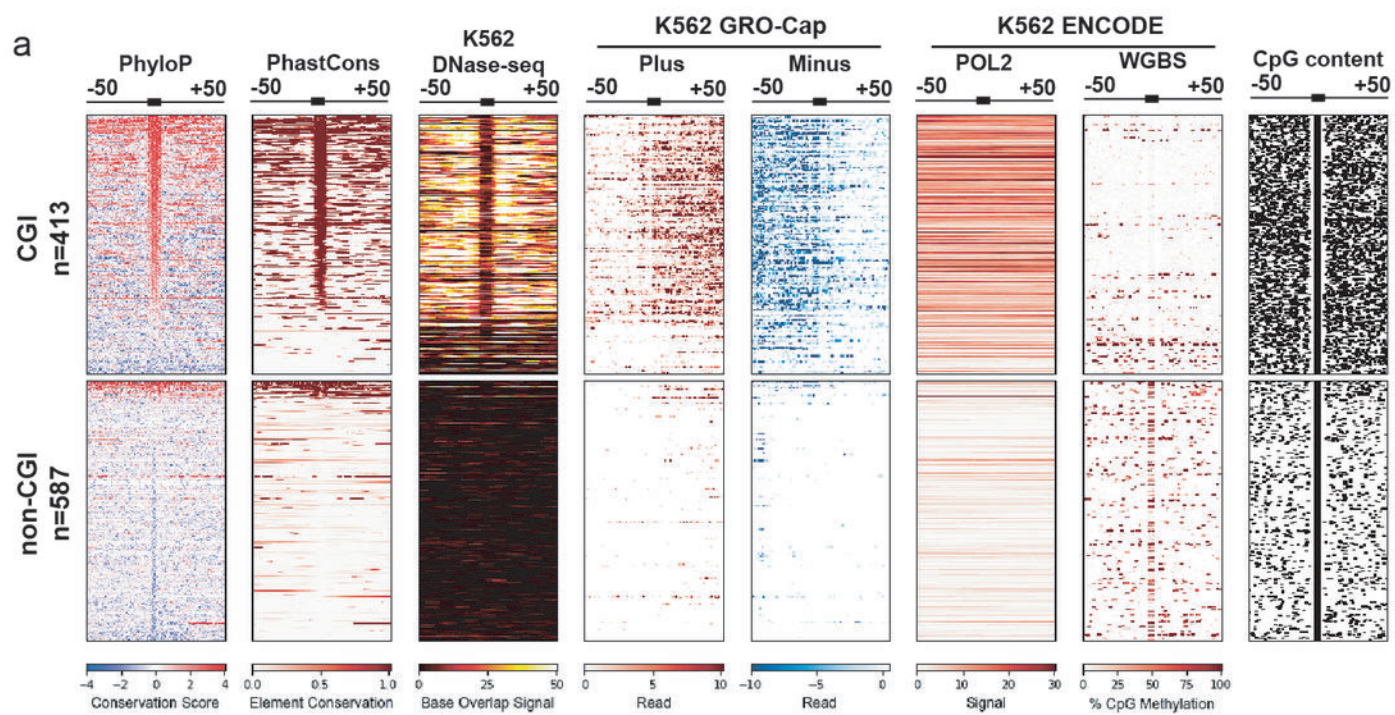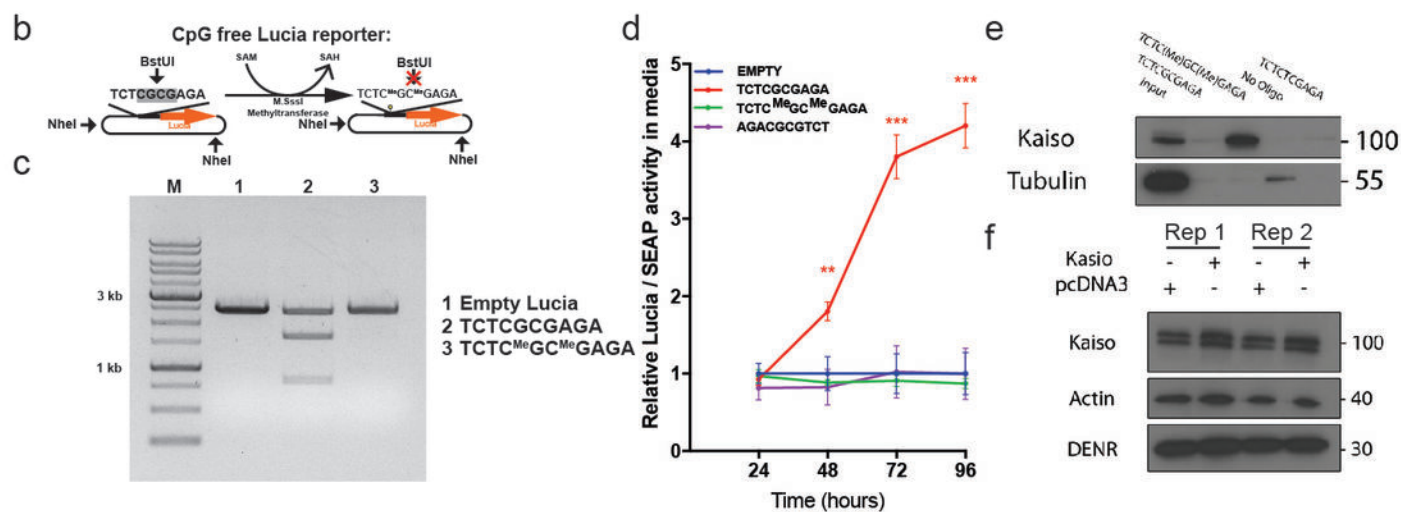

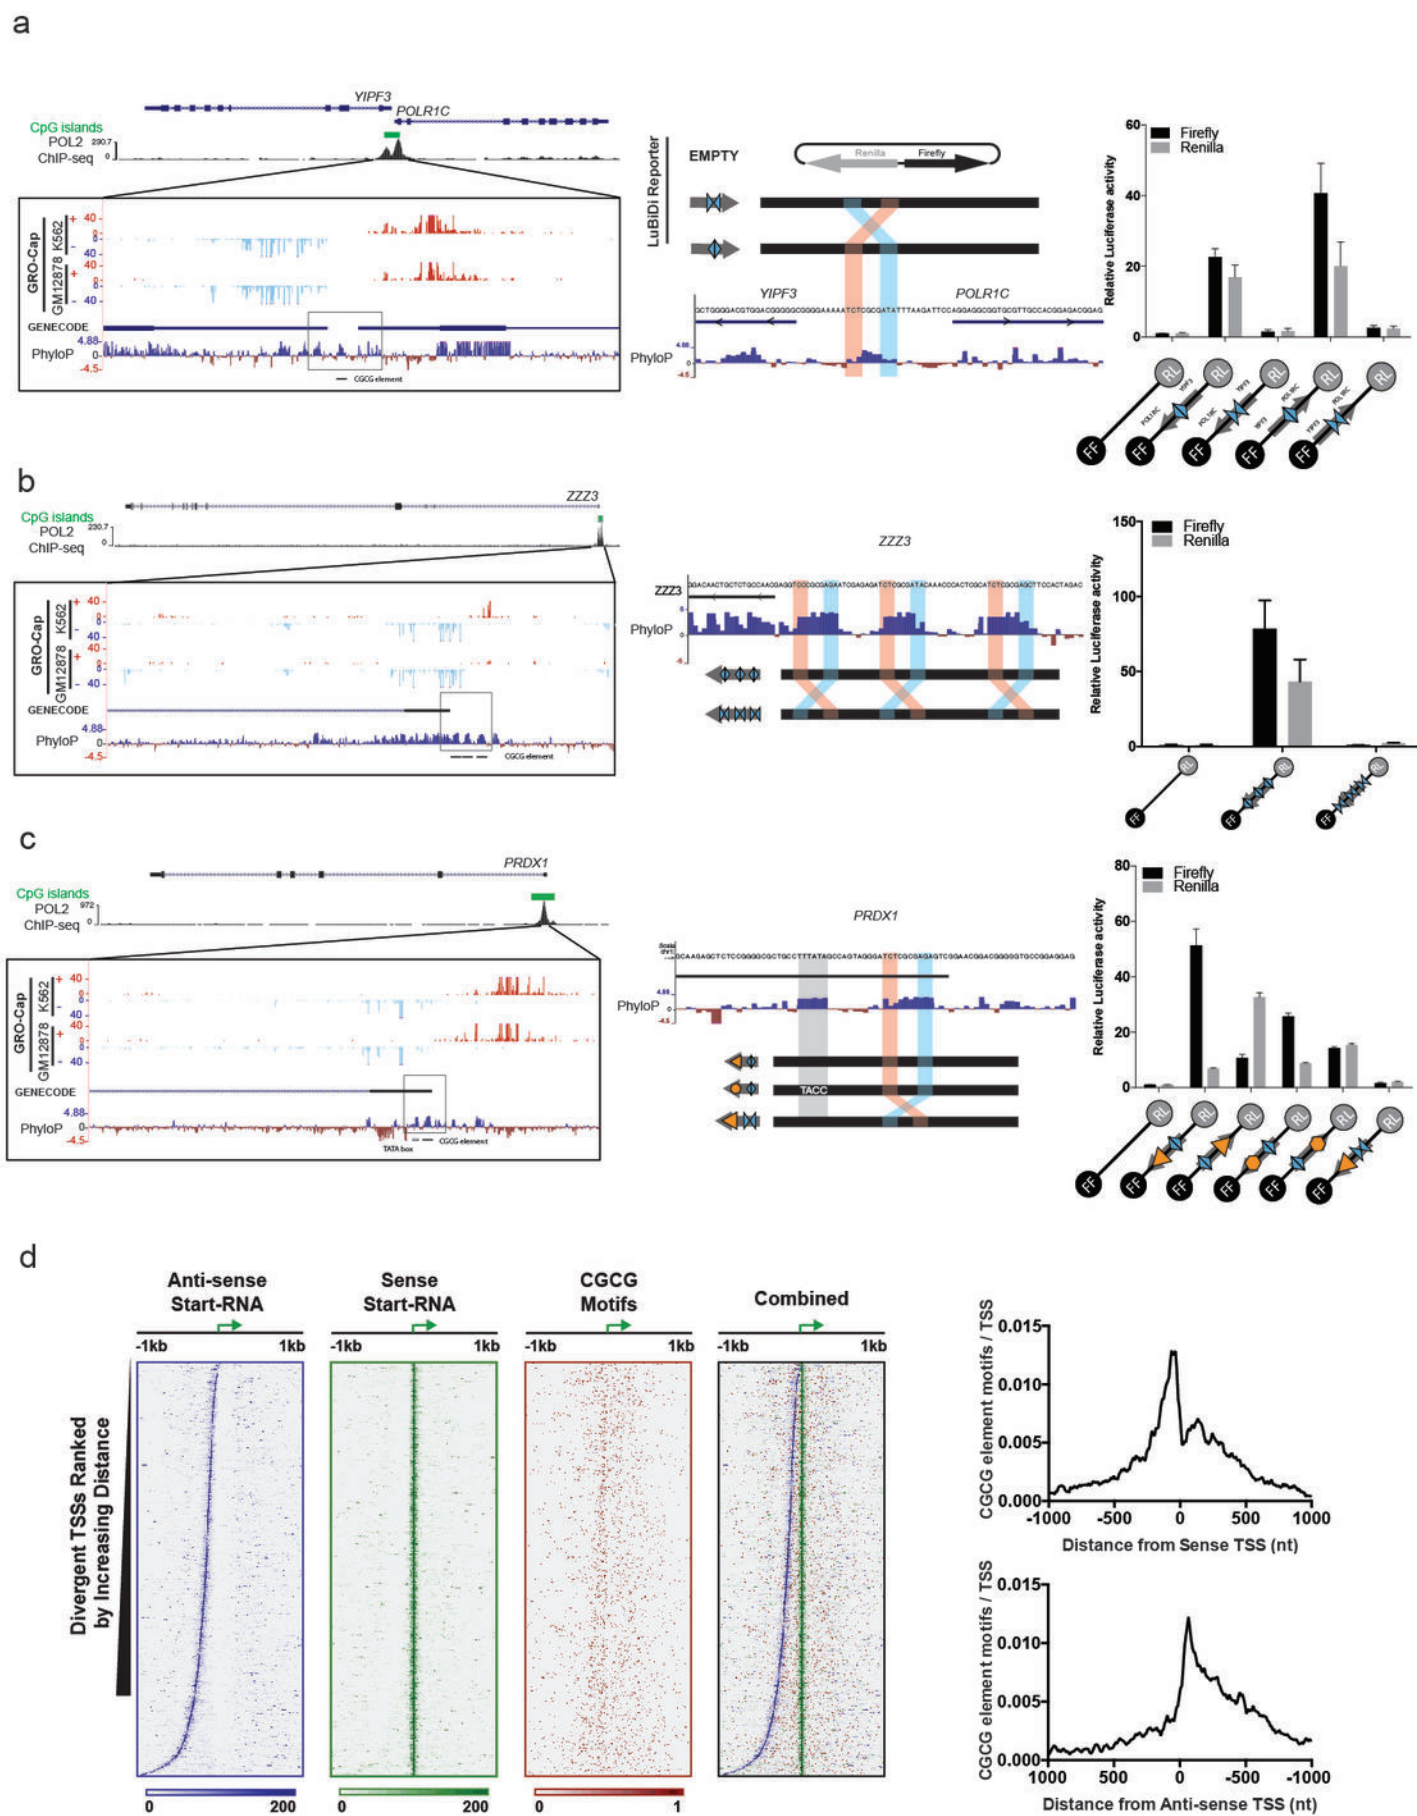



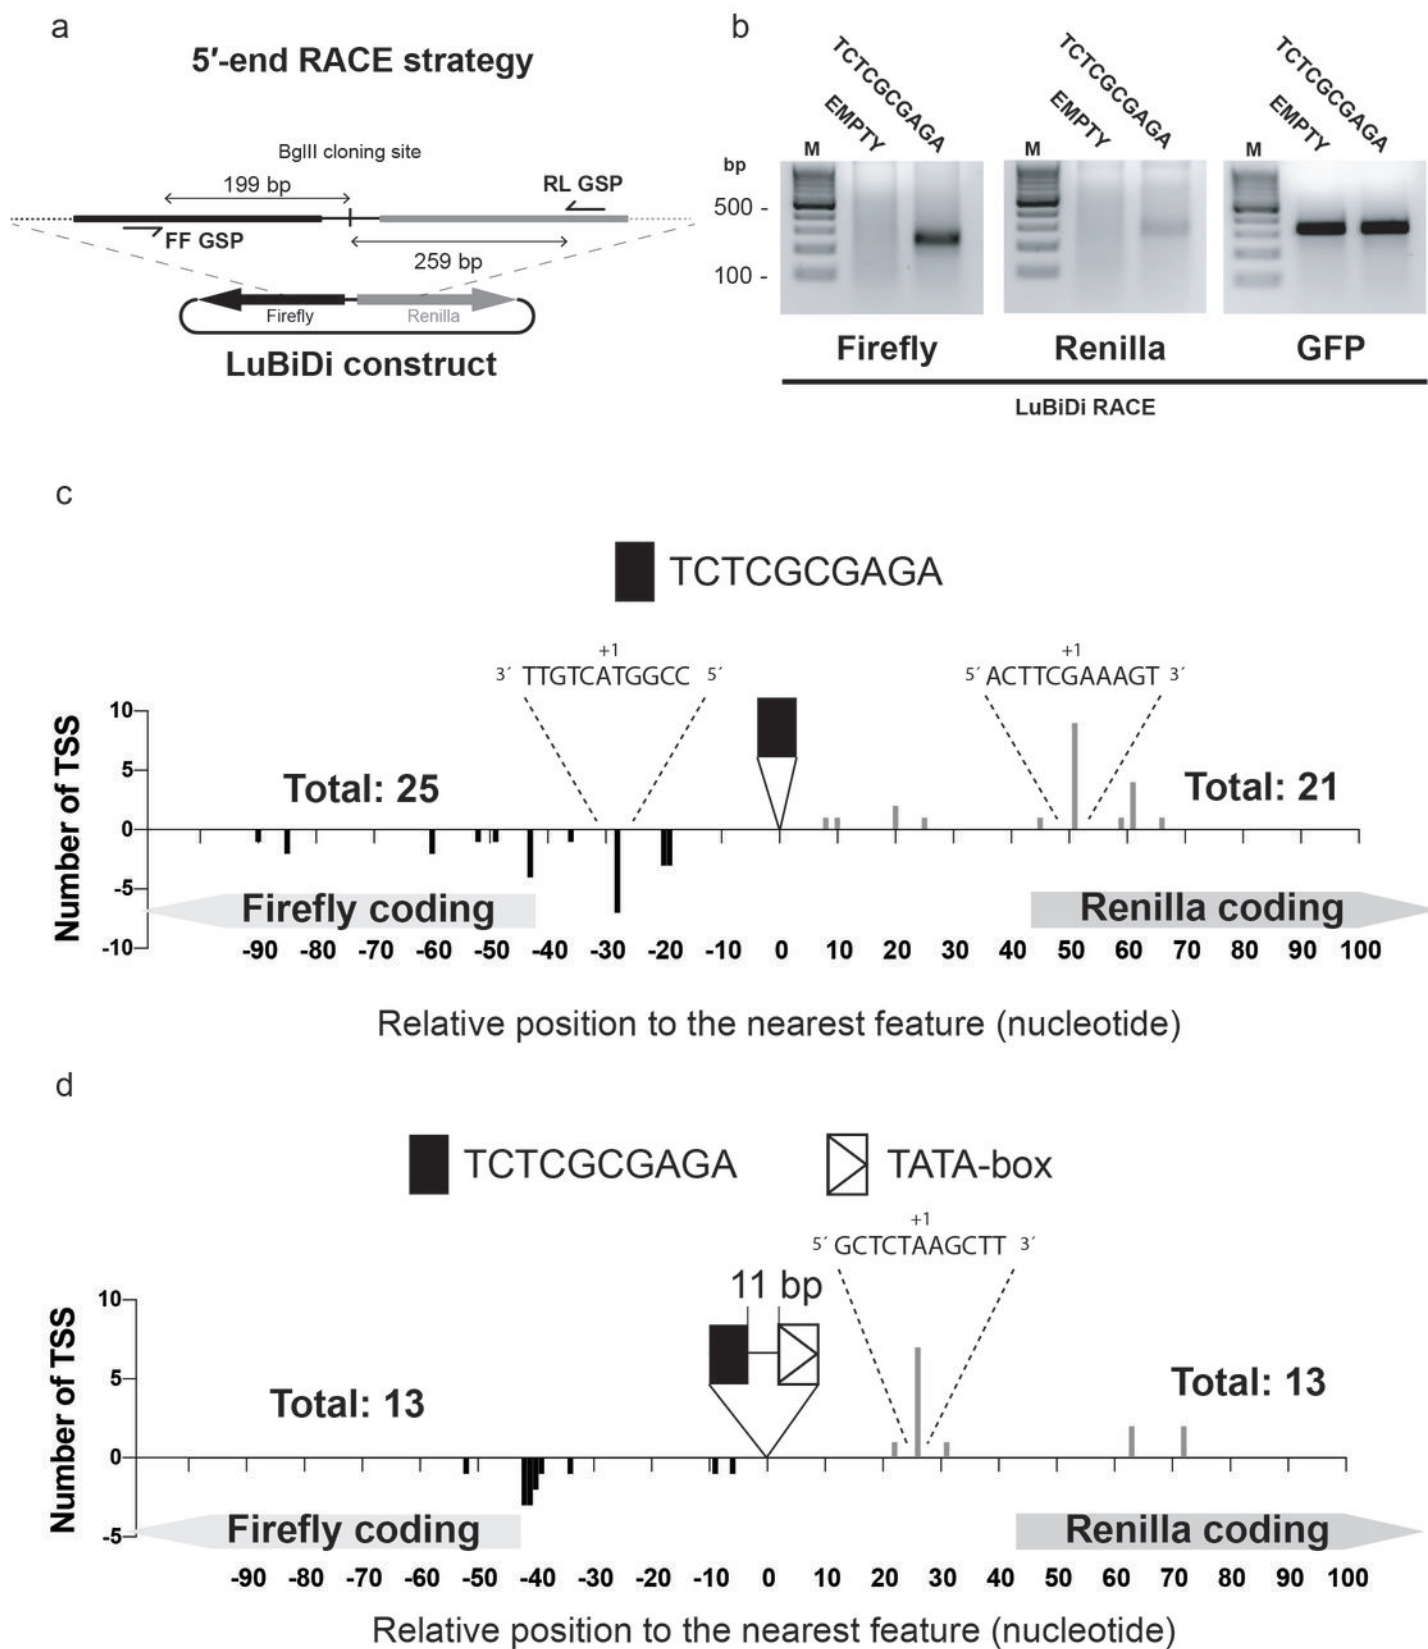

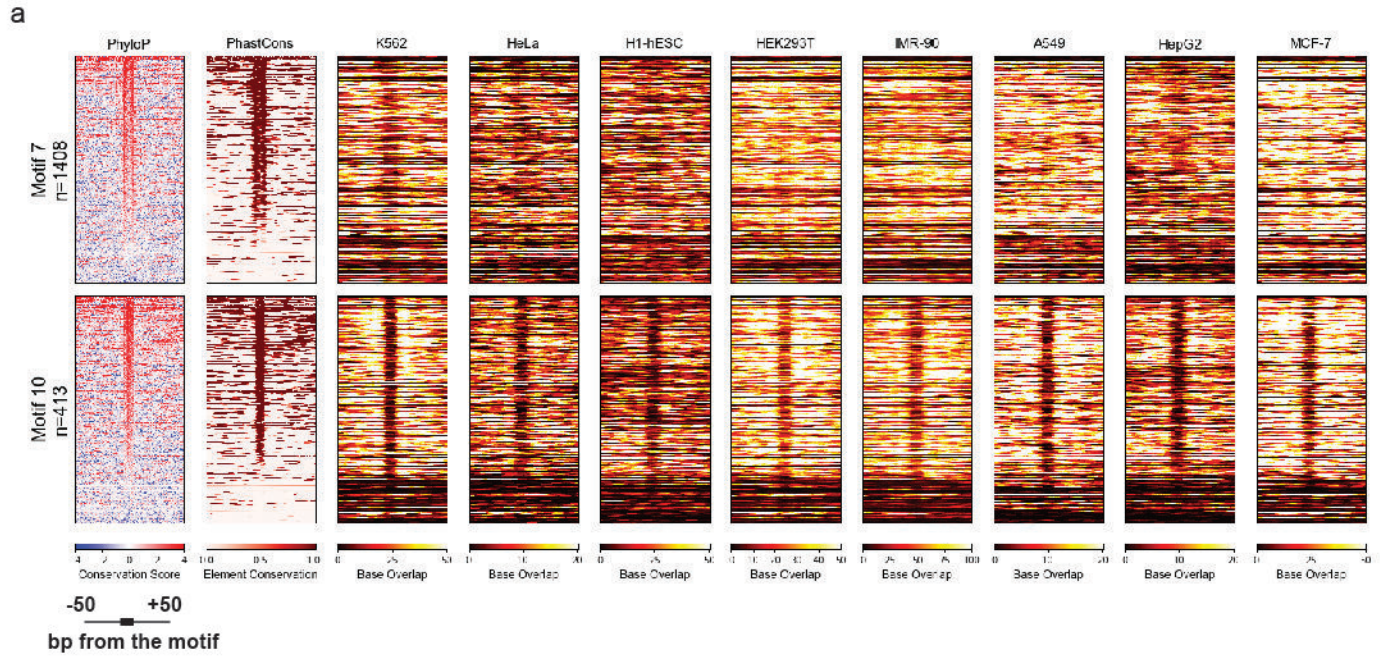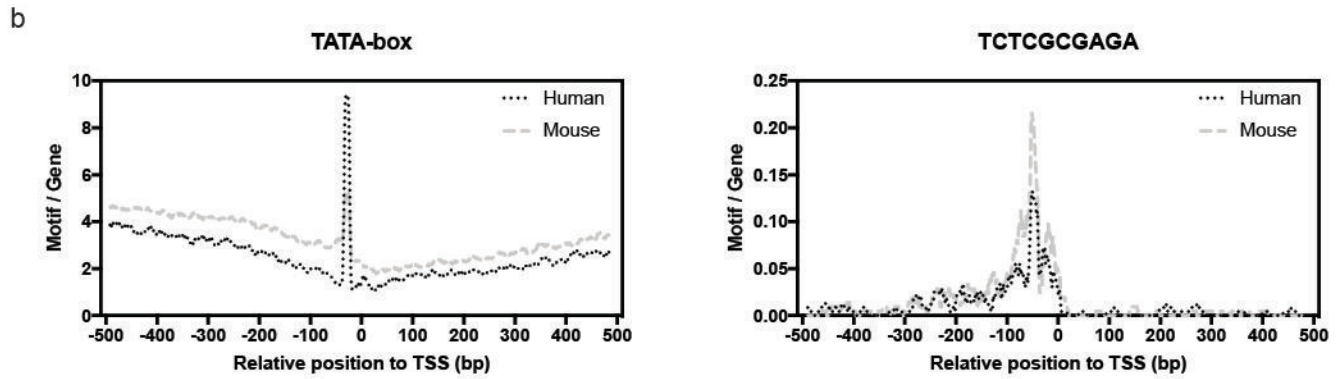

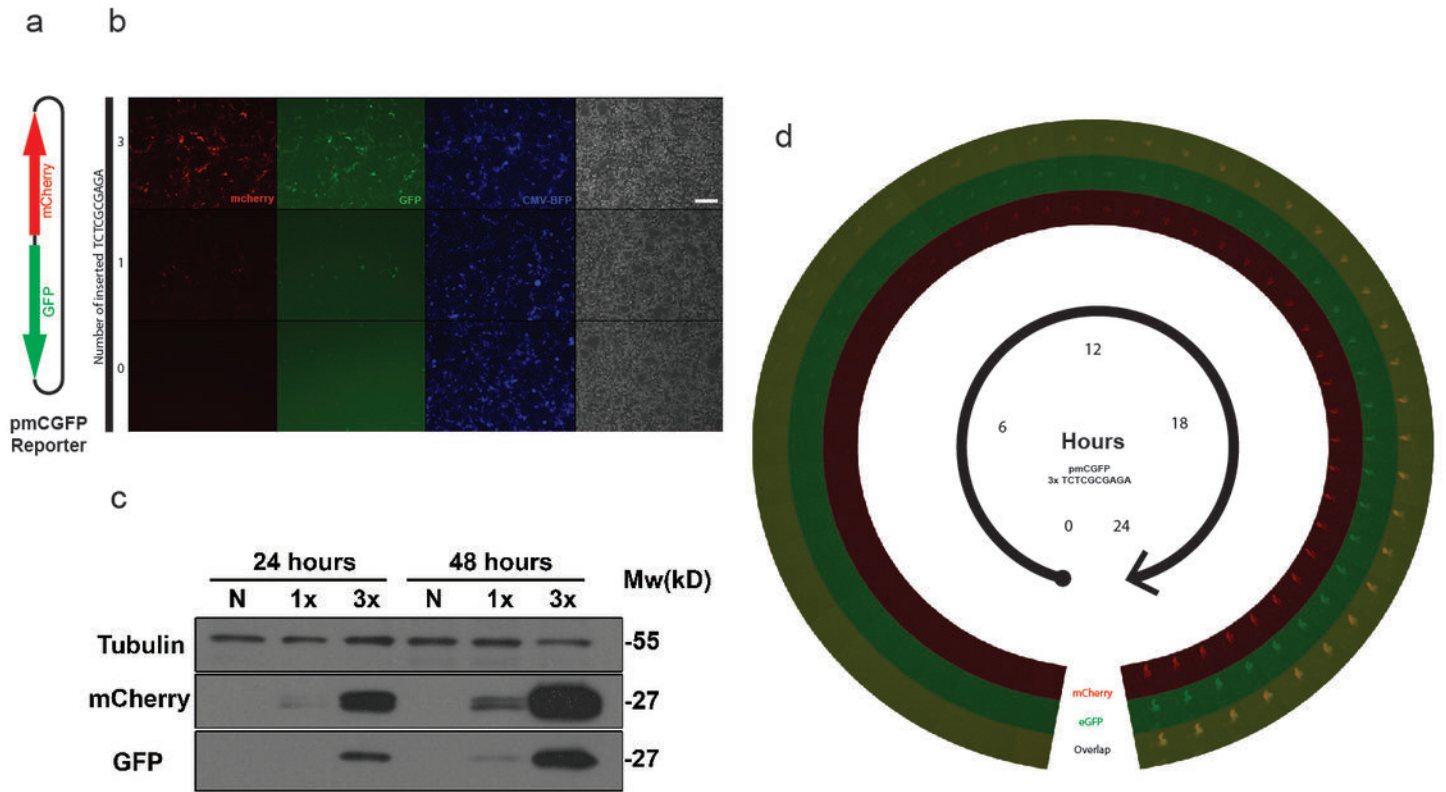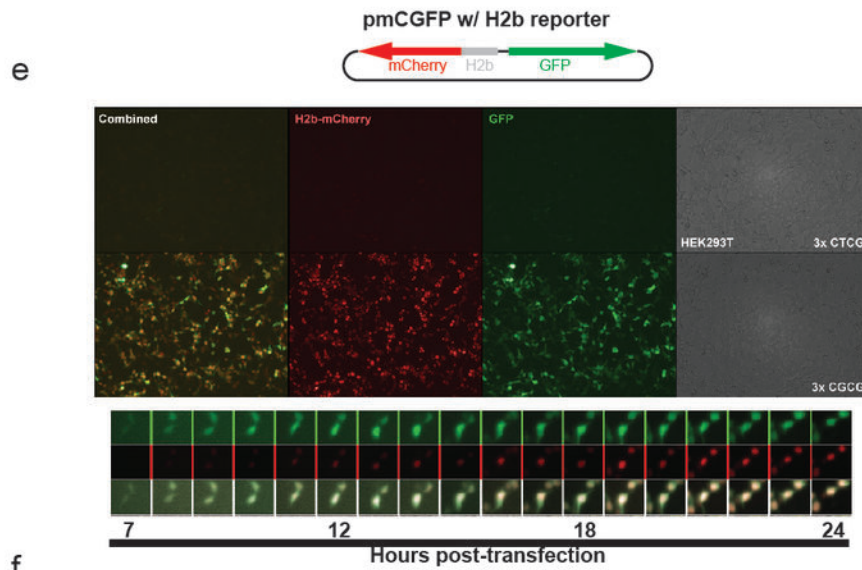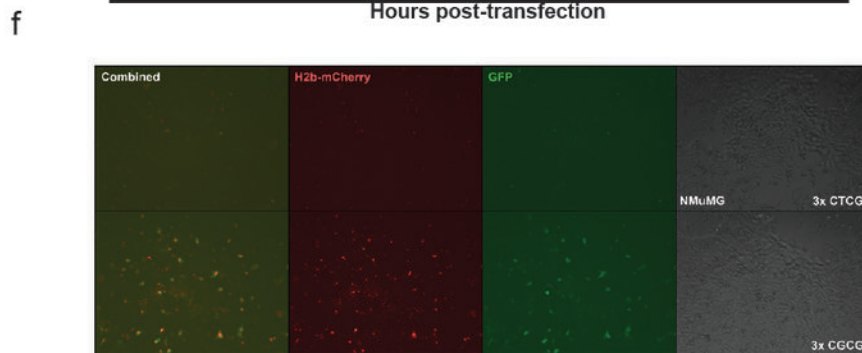



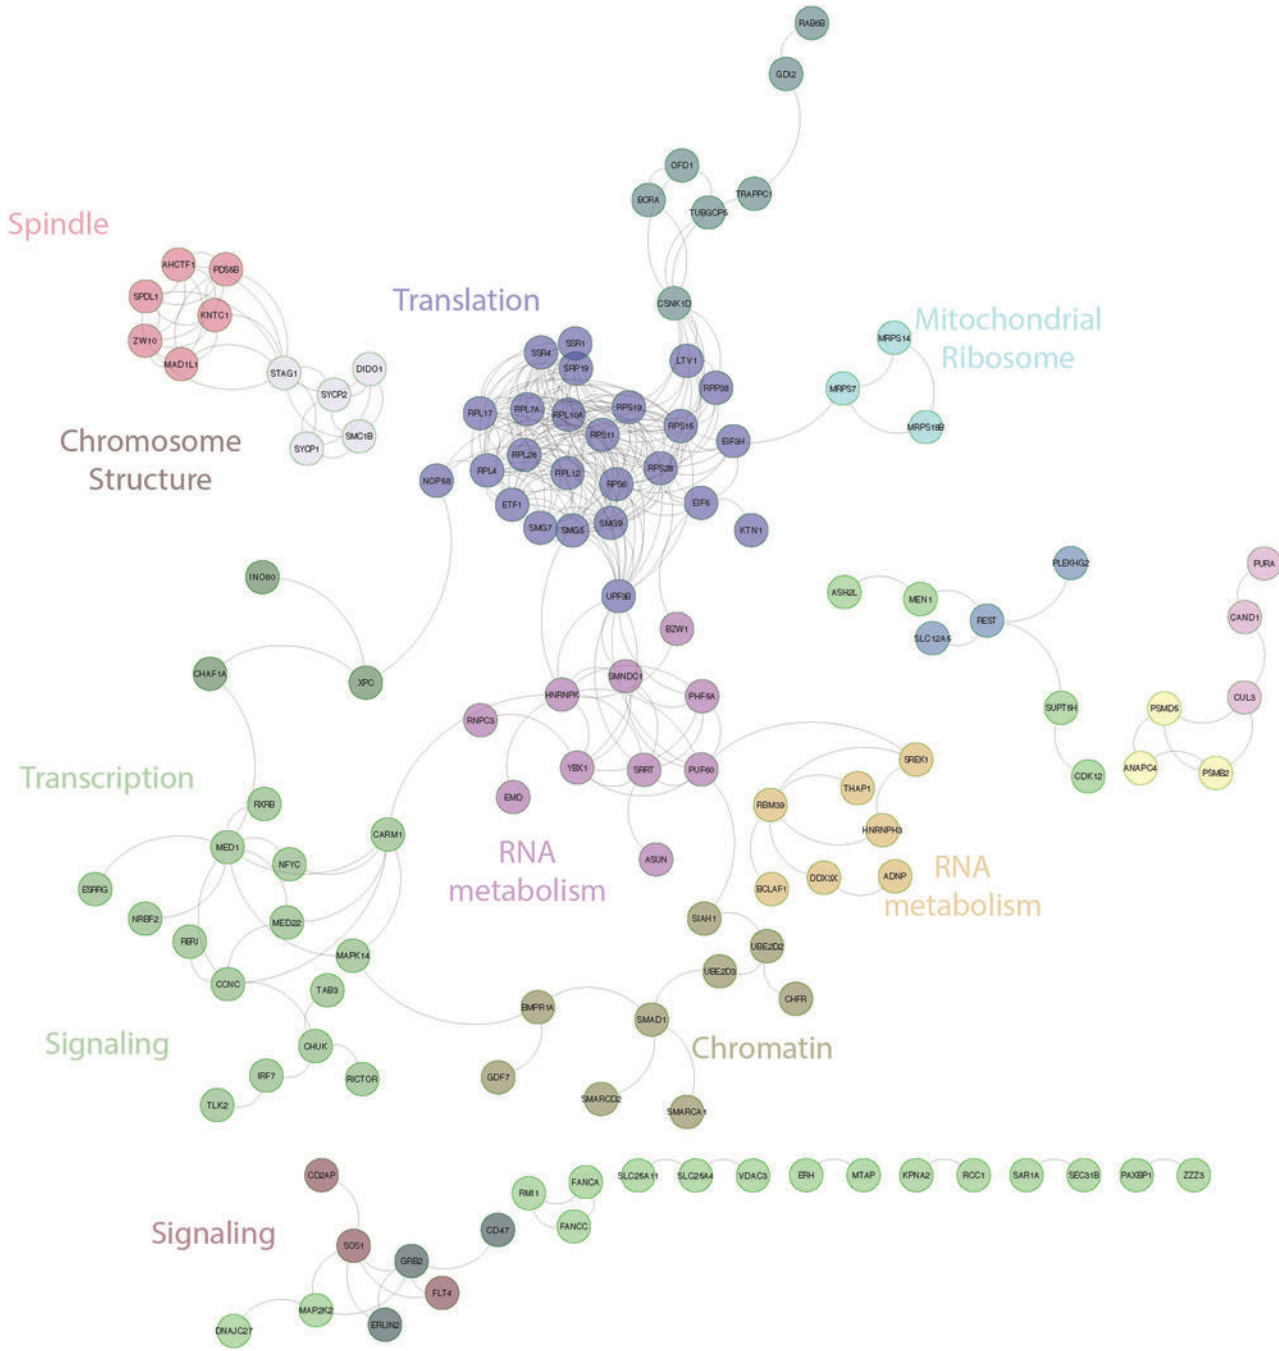



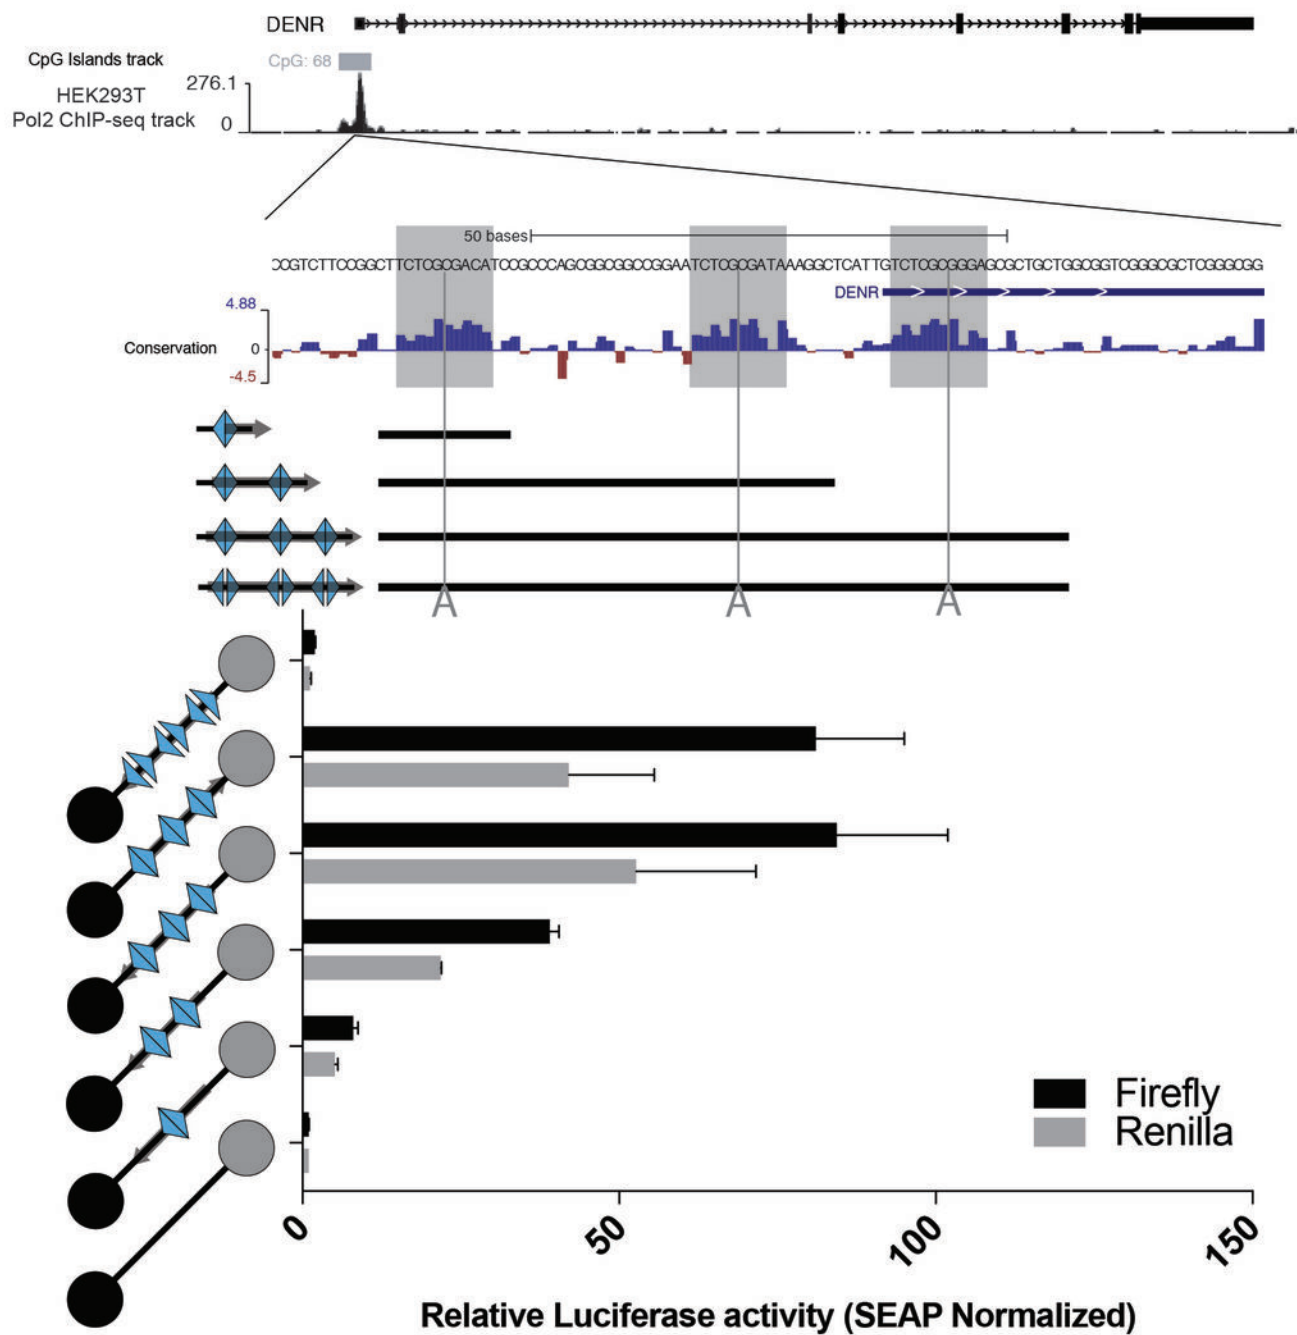

## Gene

## Sequence

|        |                                   |
|--------|-----------------------------------|
| RPL10A | CAGCAAAGTCTCTCGCGACACCCTGTACGAG   |
| RPL10A | AGCAAAGCATTATCGCGAGATCAGGGCCACT   |
| RPL12  | AAAACGCGGCTATCGCGAGAACTGTCGTCAC   |
| RPL17  | GAAC TTGACTTCTCGCGAGATTTCGTAGCCGA |
| RPL23  | CGCGGAGCGATCTCGCGGTATCCAGACTACA   |
| RPL26  | TTACCAAAGATCTCGCGAGACCTATGTCTCT   |
| RPL27A | GTGGCCGATACCTCGCGAGACTTGGCGAAGG   |
| RPL27A | AGGCGCGCAATCCCGCGAGACCAGGAGGCC    |
| RPL4   | CGAGGCCAACTCTCGCGAGTCGAGGTATCTT   |
| RPL7A  | CGGTATCAACTCTCGCGATCTCCGAGGCCGC   |
| RPP38  | AACCGCATGGTCTCGCGATAACATACCTCGCG  |
| RPS11  | TCCGTACGACTCTCGCGATAATACGGGCGGG   |
| RPS11  | GGCCTAAGACTCTCGCGAGACACCGTCTAGC   |
| RPS15  | CCTCTGACCGTCTCGCGGGGGCCGCAGTTTCG  |
| RPS15  | ATGCCGGCAGTCTCGCGATAACTGCGCAGGC   |
| RPS15A | GCGGGAGAGCTATCGCGAGACTTTCAAAGGC   |
| RPS19  | CTTTCGGA ACTCTCGCGAGACCCTACGCCCG  |
| RPS19  | CTACCCTCGCTCTCGCGAGCTTTCGGA ACTC  |
| RPS2   | CCTCAACCTCTCACGCGAGACGCTGGGCCCT   |
| RPS2   | TCTGGCAGCCCCCGCGAGACCAGACAAGG     |
| RPS28  | CGCGGCGTGGTATCGCGAGACGGGAGTGGGC   |
| RPS3A  | ACGCCTAAGTTCTCGCGCGACTCCCACTTCC   |
| RPS5   | AGACCATGTAAATCGCGAGATTGTGGTTTGA   |
| RPS6   | CGCTTTCAGTTCTCGCGAGATGAGCAGAAGT   |
| RPS7   | TTTGACGTGCTCTCGCGAGATTTGGGTCTCT   |
| RPS9   | TGGAGGTTATTCTCGCGAGATCGGATCTGGG   |

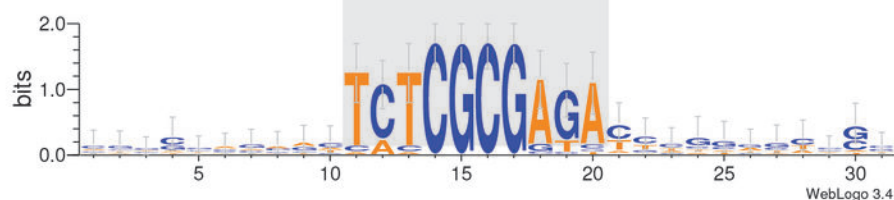

Ribosomal Protein CGCG Element Consensus sequence
